# Supplementary material for: Synergic photoprotection of phenolic compounds present in tomato fruit cuticle: a spectroscopic investigation in solution
Source: Royal Society of Chemistry journal article supplement (doi:10.1039/d3cp00630a), 2023-01-01
Supplement: d3cp00630a1.pdf [file d3cp00630a1.pdf]

## **Synergic photoprotection of phenolic compounds present in tomato fruit cuticle: a spectroscopic investigation in solution**

Ana González Moreno,<sup>\*a</sup> Jack M. Woolley,<sup>b</sup> Eva Domínguez,<sup>c</sup> Abel de Cózar,<sup>de</sup> Antonio Heredia,<sup>a</sup> and Vasilios G. Stavros<sup>\*b</sup>

a: A. González Moreno, Prof. Dr. A. Heredia

IHSM-UMA-CSIC La Mayora, Departamento de Biología Molecular y Bioquímica,  
Universidad de Málaga (UMA), 29071, Málaga, Spain

[gonzalezana@uma.es](mailto:gonzalezana@uma.es)

b: Dr J.M. Woolley, Prof. Dr. V. G. Stavros

Department of Chemistry, University of Warwick, Coventry, UK, e-mail:

[v.stavros@warwick.ac.uk](mailto:v.stavros@warwick.ac.uk)

c: Dr. E. Domínguez

IHSM-UMA-CSIC La Mayora, Plant breeding and Biotechnology, CSIC, 29750  
Algarrobo-Costa, Málaga, Spain

d: Dr. Abel de Cózar

Departamento de Química Orgánica I / Kimika Organikoa I Saila, Facultad de Química / Kimika Fakultatea, Universidad del País Vasco / Euskal Herriko Unibertsitatea (UPV/EHU) and Donostia International Physics Center (DIPC), P. K, 1072, 20018 San Sebastián – Donostia, Spain.

e: Dr. Abel de Cózar

Ikerbasque, Basque Foundation for Science, Plaza Euskadi 5, 48009, Bilbao, Spain.

## Content

**Table S1.** Total electronic energies (E, in a.u.), zero point correction of the energy (ZPCE), thermal corrections to Gibbs free energies (TCGFE, in a.u.), and number of imaginary frequencies (NIMAG) of **pca-nch** heterodimers computed at  $\omega$ B97XD(PCM, ethanol)/def2-TZVP level.

**Table S2.** Summary of the excited state lifetimes of solutions of **nch** and a 1:1 mixture of **pca** and **nch** after excitation at 365 nm in ethanol from a sequential fit. The first row indicates the pump wavelength. Errors are given as twice the standard error extracted from the Global fitting. We note the shorter  $\tau_3$  lifetime following photoexcitation at 365 nm (cf 1.15 ns (312 nm) versus 122 ps (365 nm)). We are unable to reconcile this difference.

**Table S3.** Total electronic energies<sup>a</sup> (E, in a.u.), zero point correction of the energy<sup>b</sup> (ZPCE), thermal corrections to Gibbs free energies<sup>b</sup> (TCGFE, in a.u.), and number of imaginary frequencies<sup>c</sup> (NIMAG) of all stationary points discussed in the main text.

**Table S4.**  $S_0$  and  $S_1$  electronic energies (E, in a.u.) of intersection (CI) discussed in the text computed at CASSCF(12,11)(PCM,ethanol)/ cc-pVTZ.

**Fig S1.** Solvent only transients following excitation at (a) 312 nm (integrated over 355-360 nm) (black squares) of ethanol and its curve fitting (overlaid red line). Solvent only transients following excitation at (b) 365 nm (integrated over 420-425 nm) (black squares) of ethanol and its pump-probe cross-correlation, FCC, with its curve fitting (overlaid red line). The Instrument Response Function (IRF) corresponds to the FWHM parameter of the curve fitting.

**Fig S2.** Residuals for (a) 500  $\mu$ M **pca**, (b) 500  $\mu$ M **nch** and (c) a 1:1 mixture (500  $\mu$ M : 500  $\mu$ M) of **nch** and **pca** in ethanol after excitation at 312 nm. Residuals for (d) 500  $\mu$ M **nch** and (e) a 1:1 mixture (500  $\mu$ M: 500  $\mu$ M) of **nch** and **pca** in ethanol after excitation at 365 nm. Residuals have not been chirp-corrected.

**Fig S3.** (a) UV-Vis spectra of **pca**, **nch** and a 1:1 mixture of both in ethanol. (b) Difference between the experimental mixture spectrum and the calculated spectrum as sum of **pca** and **nch** UV-Vis spectra. (c) UV-Vis spectra of 1:1

mixtures of **pca** and **nch** in ethanol at different concentrations: 0.5 (black line), 5 (red line) and 10 mM (blue line).

**Fig S4.** Left: theoretical UV-Vis spectra of **pca** computed at TD-B3LYP(PCM, ethanol)/def2TZVP// B3LYP (PCM,ethanol)/def2TZVP level and the assignment of its more relevant transitions (in nm). Right: Frontier orbitals of **pca** implied in the main transitions computed at B3LYP(PCM, ethanol)/def2TZVP. Red and blue display occupied orbitals and green and yellow unoccupied orbitals.

**Fig S5.** Left: theoretical UV-Vis spectra of **nch** computed at TD-B3LYP(PCM, ethanol)/def2TZVP//B3LYP(PCM,ethanol)/def2TZVP level and the assignment of its more relevant transitions (in nm). Right: Frontier orbitals of **nch** implied in the main transitions computed at B3LYP(PCM, ethanol)/def2TZVP. Red and blue display occupied orbitals and green and yellow unoccupied orbitals.

**Fig S6.** (a,b) Bond distances (in Å) and (c,d) dihedral angles from optimized DFT//B3LYP(PCM, ethanol)/def2TZVP ground state ( $S_0$ ) molecular structures of **pca** and **nch**, respectively.

**Fig S7.** Photostability of a 1:2 mixture of **pca** and **nch** (250  $\mu$ M: 500  $\mu$ M) in ethanol. UV-Vis spectra were recorded at different time intervals of solar irradiation of solution. The downwards arrows represent the absorbance difference before and after two hours of irradiation. The vertical dashed line indicates the critical wavelength. Molar extinction coefficient ( $\epsilon$ ) and maximum wavelengths are pointed in the graph.

**Fig S8.**  $^1\text{H-NMR}$  spectra of **nch** in ethanol before and after 5 h of continuous irradiation at 365 nm. Coupling constants are shown.

**Fig S9.** Photostability of a 1:1 mixture of **pca** and **nch** in ethanol after subtracting **nch** UV-Vis spectrum. The downwards arrow represents the absorbance difference before and after two hours of irradiation.

**Fig S10.** Absorbance spectra of **pca** (black line) and **nch** (blue line) and fluorescence spectrum of **pca** (red line) in ethanol.

**Fig S11.** Stern-Volmer plot of the **pca** quenching by increasing concentrations of **nch**, where  $F_0$  and  $F$  are fluorescence emission intensities in absence and presence of the quencher (**nch**). At low concentrations a linear fit was reached,

corresponding the slope of the line to  $K_{SV}$  (Stern-Volmer constant). At higher concentrations, data deviates from a linear to an exponential fit.

**Fig S12.** Schematic representation of all the **pca-nch** H-bonded and  $\pi$ - $\pi$  stacked heterodimers analysed.

**Fig S13.** Geometries of the most stable **pca-nch**  $\pi$ - $\pi$  stacked heterodimers. Under each dimer, their respective binding energy ( $E_{\text{binding}}(X,Y)$ ) and binding free energies ( $\Delta G_f^0(X,Y)$ ) are shown. Energy values computed at the  $\omega$ B97XD(PCM, ethanol)/def2tzvp level are in kcal/mol. The nomenclature of the dimers is shown in FigS12.

**Fig S14.** Geometries of the most stable **pca-nch** H-bonded heterodimers. Under each dimer, their respective binding energy ( $E_{\text{binding}}(X,Y)$ ) and binding free energies ( $\Delta G_f^0(X,Y)$ ) are shown. Energy values computed at the  $\omega$ B97XD(PCM, ethanol)/def2-TZVP level are in kcal/mol. The nomenclature of the dimers is shown in FigS12.

**Fig S15.** Power dependence studies of absorption bands of **pca** solution in ethanol excited at 312 nm at: (a) 335 (at time delay 1.8 ns), (b) 370 (at time delay 500 fs) (c) 390 (at time delay 1.8 ns) and (d) 625 nm (at time delay 1.8 ns). (e) Power dependence study of **nch** solution in ethanol (excited at 312 nm) at 420 nm (at time delay 500 fs).

**Fig S16.** TAS (left) and evolutionary associated difference spectra (EADS) computed by sequential fit (right) of (a) 500  $\mu$ M **nch** and (c) a 1:1 mixture (500  $\mu$ M: 500  $\mu$ M) of **nch** and **pca** in ethanol (excitation at 365 nm).

**Fig S17.** (a) Predicted TAS map for an equimolar mixture of **pca** and **nch** in ethanol calculated as manual sum of the TAS maps of their individual compounds. (b) Experimental TAS map of an equimolar **pca-nch** mixture in methanol.

**Fig S18.** Frontier orbitals selected as active space in the CASSCF calculations of the conical intersections. Red/blue and green/yellow colors are used to represent occupied and virtual orbitals, respectively.

Cartesian coordinates (optimized at the B3LYP (PCM,ethanol)/def2-TZVP level) of all the stationary points collected in the main text associated with the absorption spectra calculation.

Cartesian coordinates (optimized at the  $\omega$ B97XD(PCM,ethanol)/6-31+G(d,p) level) of all the stationary points collected in the main text associated with the  $S_0$  and  $S_1$  surface exploration for **nch**.

Cartesian coordinates of conical intersection computed at the CASSCF(12,11)(PCM,ethanol)/6-31+G(d,p) level of theory for **nch**.

Cartesian coordinates (optimized at the  $\omega$ B97XD(PCM, ethanol)/def2-TZVP level) of all the stationary points associated to **pca-nch** heterodimers.

**Table S1.** Total electronic energies (E, in a.u.), zero point correction of the energy (ZPCE), thermal corrections to Gibbs free energies (TCGFE, in a.u.), and number of imaginary frequencies (NIMAG) of **pca-nch** heterodimers computed at  $\omega$ B97XD(PCM, ethanol)/def2-TZVP level.

| Structure                                                                | E            | ZPCE     | TCGFE    | NIMAG |
|--------------------------------------------------------------------------|--------------|----------|----------|-------|
| <b>pca</b>                                                               | -573.494641  | 0.154710 | 0.117440 | 0     |
| <b>nch</b>                                                               | -955.001889  | 0.244371 | 0.197790 | 0     |
| <b>H ... T' conformer 1</b>                                              | -1528.508651 | 0.400328 | 0.334470 | 0     |
| <b>H ... T' conformer 2</b>                                              | -1528.511054 | 0.400346 | 0.335270 | 0     |
| <b>(H ... H' + T ... T')<sub>h</sub></b>                                 | -1528.513237 | 0.400880 | 0.338055 | 0     |
| <b>(H ... H' + T ... T')<sub>t</sub></b>                                 | -1528.511948 | 0.400919 | 0.338412 | 0     |
| <b>T ... H'</b>                                                          | -1528.508908 | 0.400917 | 0.337365 | 0     |
| <b>(H ... T' + T ... H')<sub>t</sub></b>                                 | -1528.516336 | 0.400901 | 0.339185 | 0     |
| <b>O<sup>A</sup> ... H<sup>a</sup></b>                                   | -1528.513443 | 0.400566 | 0.337440 | 0     |
| <b>O<sup>A</sup> ... H<sup>b</sup> + T ... T'</b>                        | -1528.516809 | 0.401341 | 0.338339 | 0     |
| <b>O<sup>C</sup> ... H<sup>a</sup> + T ... T'</b>                        | -1528.512471 | 0.401057 | 0.338735 | 0     |
| <b>H<sup>1</sup> ... O<sup>α</sup> + O<sup>A</sup> ... H<sup>a</sup></b> | -1528.510070 | 0.400413 | 0.335016 | 0     |
| <b>H<sup>2</sup> ... O<sup>α</sup></b>                                   | -1528.516242 | 0.401141 | 0.339165 | 0     |
| <b>H<sup>3</sup> ... O<sup>α</sup> + H<sup>4</sup> ... O<sup>γ</sup></b> | -1528.515111 | 0.401112 | 0.338339 | 0     |
| <b>H<sup>4</sup> ... O<sup>α</sup> + O<sup>B</sup> ... H<sup>a</sup></b> | -1528.507940 | 0.400997 | 0.334149 | 0     |
| <b>H<sup>3</sup> ... O<sup>γ</sup> + H<sup>4</sup> ... O<sup>α</sup></b> | -1528.517703 | 0.402500 | 0.342243 | 0     |

Values computed at 298.15K.

**Table S2.** Summary of the excited state lifetimes of solutions of **nch** and a 1:1 mixture of **pca** and **nch** after excitation at 365 nm in ethanol from a sequential fit. The first row indicates the pump wavelength. Errors are given as twice the standard error extracted from the Global fitting. We note the shorter  $\tau_3$  lifetime following photoexcitation at 365 nm (cf 1.15 ns (312 nm) versus 122 ps (365 nm)). We are unable to reconcile this difference.

| $\lambda_{\text{pump}} = 365 \text{ nm}$ |               |               |               |
|------------------------------------------|---------------|---------------|---------------|
|                                          | $\tau_1$ (fs) | $\tau_2$ (ps) | $\tau_3$ (ps) |
| <b>nch</b>                               | 710 ± 90      | 3.73 ± 0.09   | 121.61 ± 4.68 |
| <b>mix</b>                               | 490 ± 90      | 2.42 ± 0.09   | 24.53 ± 0.76  |

**Table S3.** Total electronic energies<sup>a</sup> (E, in a.u.), zero point correction of the energy<sup>b</sup> (ZPCE), thermal corrections to Gibbs free energies<sup>b</sup> (TCGFE, in a.u.), and number of imaginary frequencies<sup>c</sup> (NIMAG) of all stationary points discussed in the main text.

| Structure                    | E           | ZPCE     | TCGFE    | NIMAG( $\nu$ ) |
|------------------------------|-------------|----------|----------|----------------|
| <b>s-trans-S<sub>0</sub></b> | -954.698990 | 0.244824 | 0.197765 | 0              |
| <b>TS-S<sub>0</sub></b>      | -954.621345 | 0.240581 | 0.193807 | 1 (-894.2612)  |
| <b>s-cis-S<sub>0</sub></b>   | -954.691730 | 0.245070 | 0.200184 | 0              |
| <b>s-trans-S<sub>1</sub></b> | -954.579602 | 0.241671 | 0.195240 | 0              |
| <b>TS-S<sub>1</sub></b>      | -954.574585 | 0.240481 | 0.194950 | 1 (-211.3240)  |
| <b>s-cis-S<sub>1</sub></b>   | -954.602026 | 0.284390 | 0.237911 | 0              |

<sup>a</sup>Computed at  $\omega$ B97XD(PCM,ethanol)/6-31+G(d,p) level of theory. <sup>b</sup>Computed at 298.15 K. <sup>c</sup> If NIMAG=1, the imaginary frequency ( $\nu$ ), in parenthesis, is given in  $\text{cm}^{-1}$ .



**Table S4.**  $S_0$  and  $S_1$  electronic energies (E, in a.u.) of intersection (CI) discussed in the text computed at CASSCF(12,11)(PCM,ethanol)/ cc-pVTZ.

| Structure | E $S_0$      | E $S_1$       |
|-----------|--------------|---------------|
| CI        | -949.6632309 | -949.66377154 |

The Full Width Half Maximum (FWHM) of our instrument response provides the minimum value for lifetimes acquired through the fitting procedure. It also is a required input as an initial guess in the fitting. Solvent only scans under the same experimental conditions as the data were collected and then fitted with Equation 1.<sup>1</sup>

$$F_{cc} = \exp \left[ -\frac{-t_d + (t_0(\omega))^2}{\tau^2} \right] \quad 1.$$

Here,  $t_d$  is pump-probe time delay,  $t_0(\omega)$  is the temporal overlap between the pump and probe (for a given  $\omega$ ) and  $\tau$  is the pump pulse duration ( $\tau = 100$  fs for Figure S1a, 180 fs for Figure S1b). Applying this fitting procedure takes into account the winged gaussian observed in Figure S1b which form part of the instrument response.

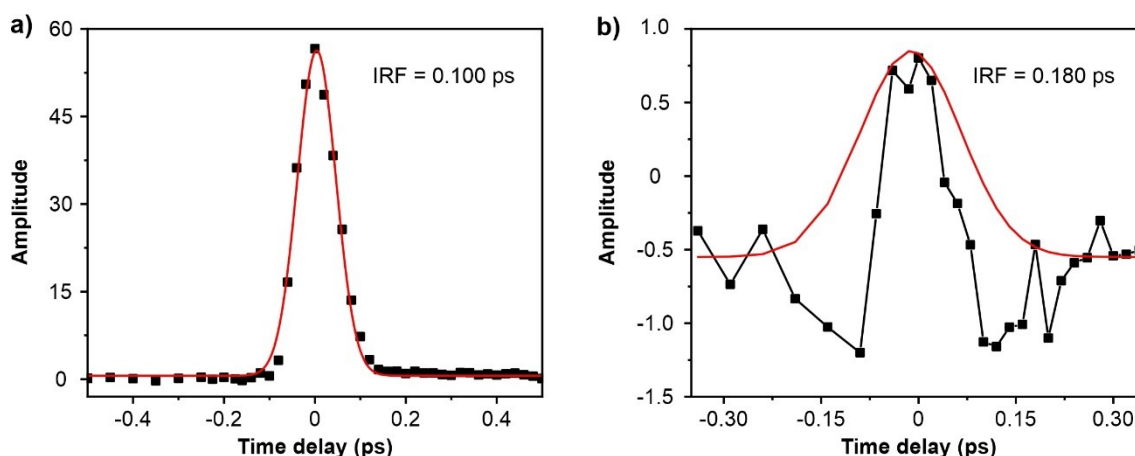

**Fig S1.** Solvent only transients following excitation at (a) 312 nm (integrated over 355-360 nm) (black squares) of ethanol and its curve fitting (overlaid red line). Solvent only transients following excitation at (b) 365 nm (integrated over 420-425 nm) (black squares) of ethanol and its pump-probe cross-correlation, FCC, with its curve fitting (overlaid red line). The instrument response function (IRF) corresponds to the FWHM parameter of the curve fitting.

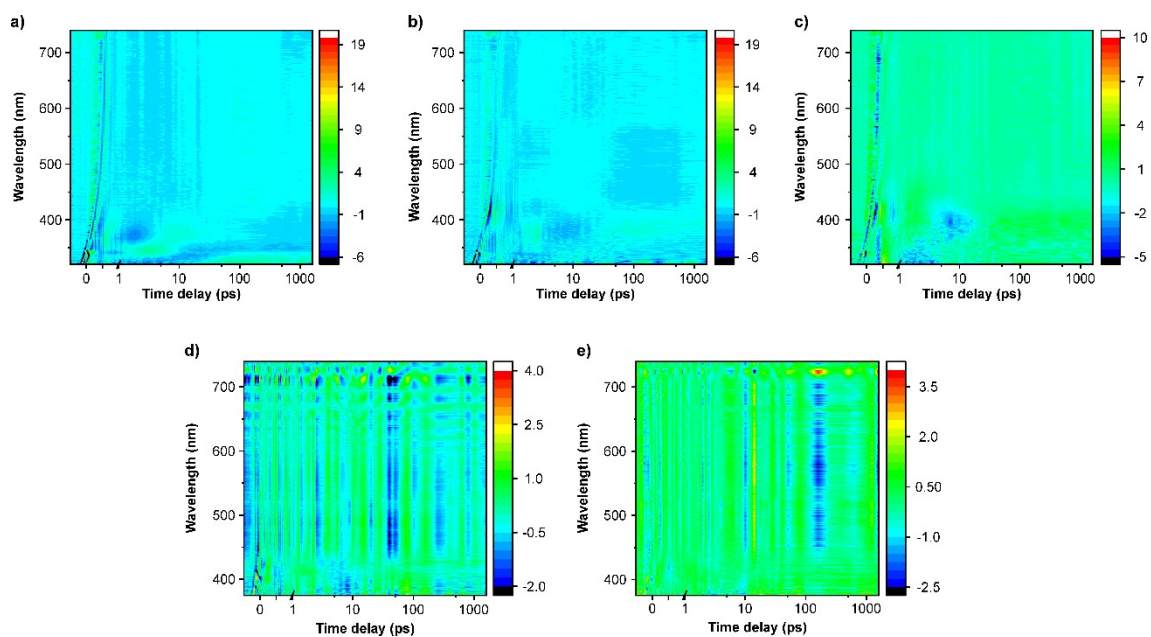

**Fig S2.** Residuals for (a) 500  $\mu\text{M}$  **pca**, (b) 500  $\mu\text{M}$  **nch** and (c) a 1:1 mixture (500  $\mu\text{M}$  : 500  $\mu\text{M}$ ) of **nch** and **pca** in ethanol after excitation at 312 nm. Residuals for (d) 500  $\mu\text{M}$  **nch** and (e) a 1:1 mixture (500  $\mu\text{M}$ : 500  $\mu\text{M}$ ) of **nch** and **pca** in ethanol after excitation at 365 nm. Residuals have not been chirp-corrected.

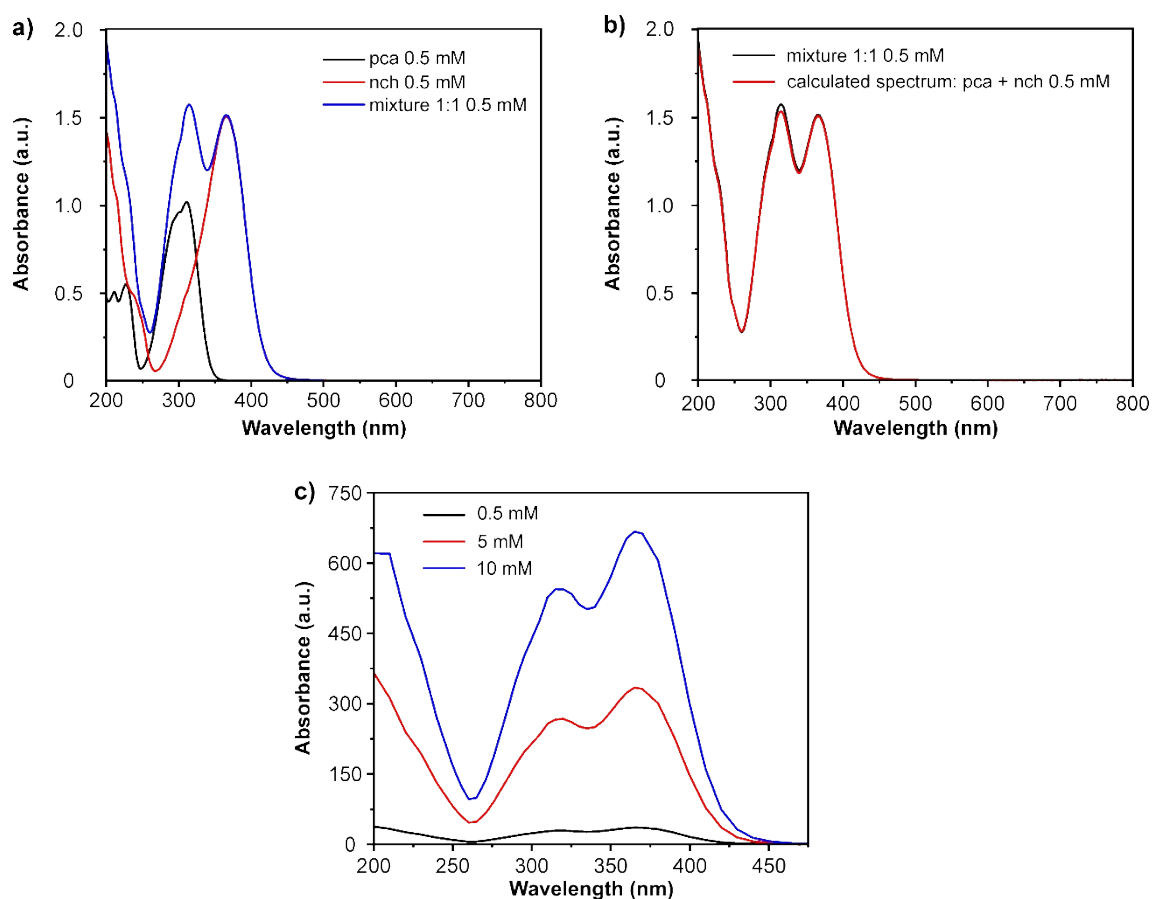

**Fig S3.** (a) UV-Vis spectra of **pca**, **nch** and a 1:1 mixture of both in ethanol. (b) Difference between the experimental mixture spectrum and the calculated spectrum as sum of **pca** and **nch** UV-Vis spectra. (c) UV-Vis spectra of 1:1 mixtures of **pca** and **nch** in ethanol at different concentrations: 0.5 (black line), 5 (red line) and 10 mM (blue line).

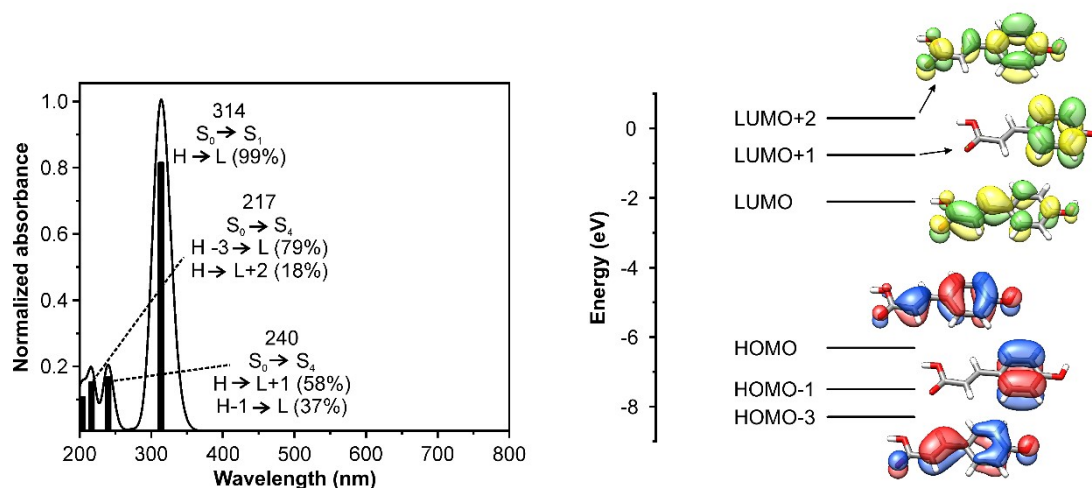

**Fig S4.** Left: theoretical UV-Vis spectra of **pca** computed at TD-B3LYP(PCM, ethanol)/def2TZVP// B3LYP (PCM, ethanol)/def2TZVP level and the assignment of its more relevant transitions (in nm). Right: Frontier orbitals of **pca** implied in the main transitions computed at B3LYP(PCM, ethanol)/def2TZVP. Red and blue display occupied orbitals and green and yellow unoccupied orbitals.

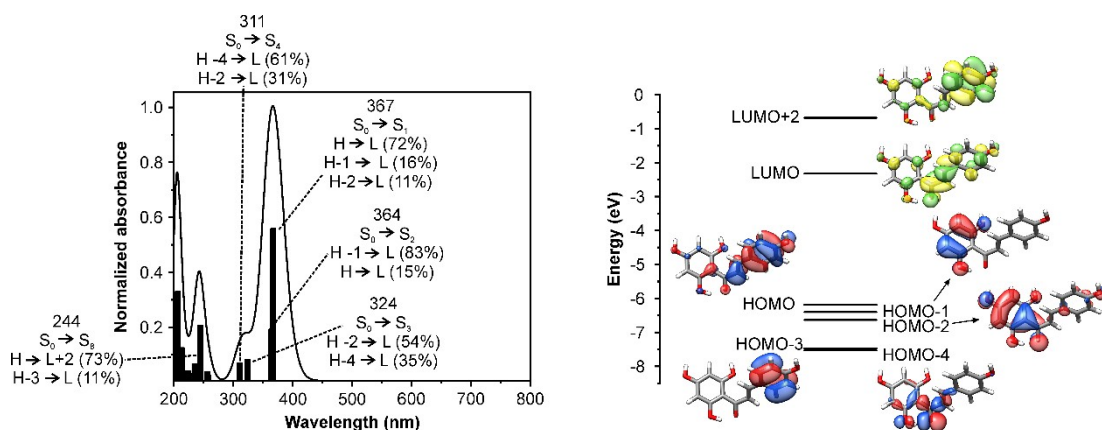

**Fig S5.** Left: theoretical UV-Vis spectra of **nch** computed at TD-B3LYP(PCM, ethanol)/def2TZVP//B3LYP(PCM, ethanol)/def2TZVP level and the assignment of its more relevant transitions (in nm). Right: Frontier orbitals of **nch** implied in the main transitions computed at B3LYP(PCM, ethanol)/def2TZVP. Red and blue display occupied orbitals and green and yellow unoccupied orbitals.

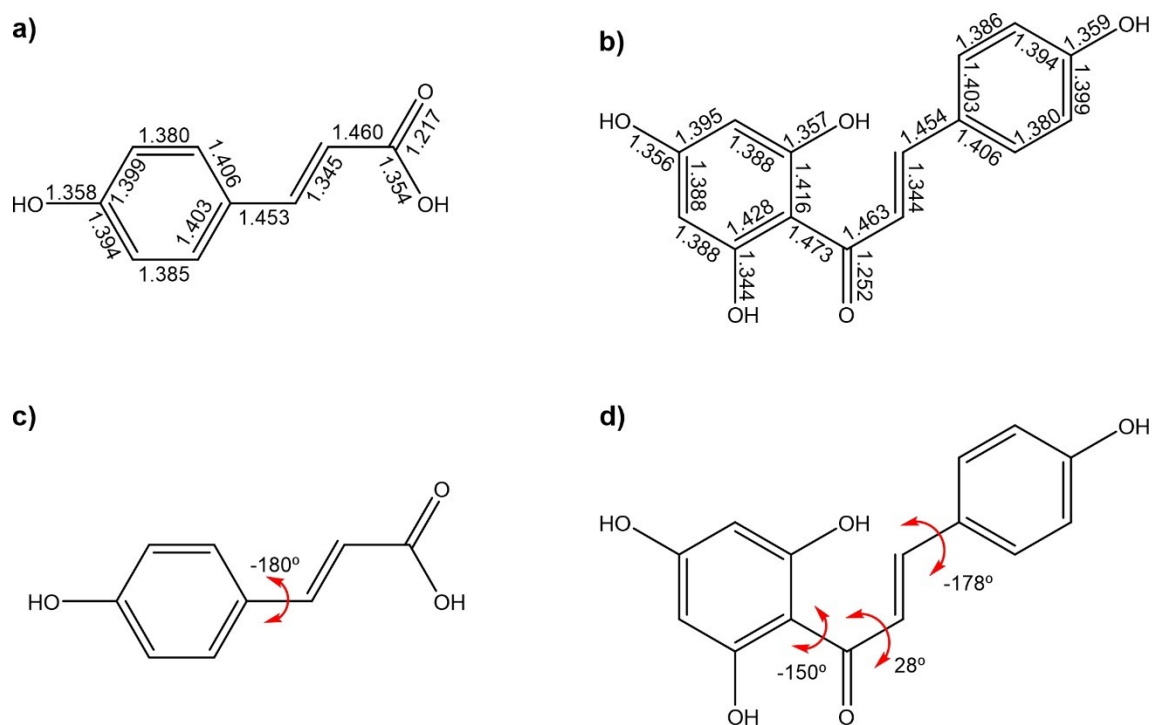

**Fig S6.** (a,b) Bond distances (in Å) and (c,d) dihedral angles from optimized DFT//B3LYP(PCM, ethanol)/def2TZVP ground state ( $S_0$ ) molecular structures of **pca** and **nch**, respectively.

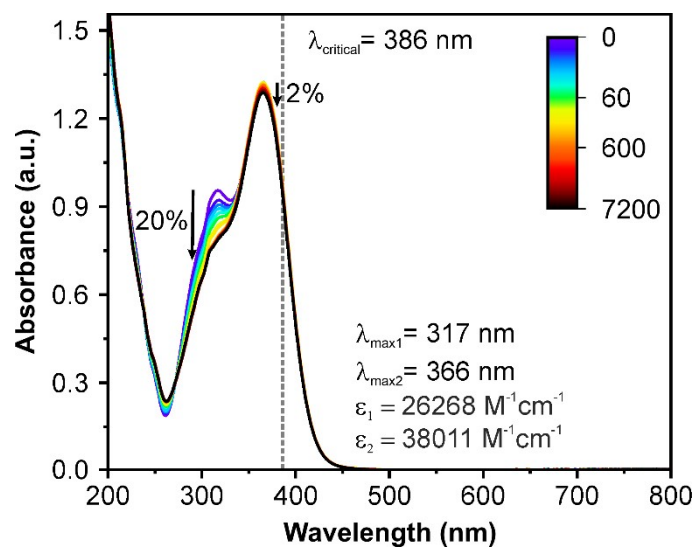

**Fig S7.** Photostability of a 1:2 mixture of **pca** and **nch** (250  $\mu$ M: 500  $\mu$ M) in ethanol. UV-Vis spectra were recorded at different time intervals of solar irradiation of solution. The downwards arrows represent the absorbance difference before and after two hours of irradiation. The vertical dashed line indicates the critical wavelength. Molar extinction coefficient ( $\epsilon$ ) and maximum wavelengths are pointed in the graph.



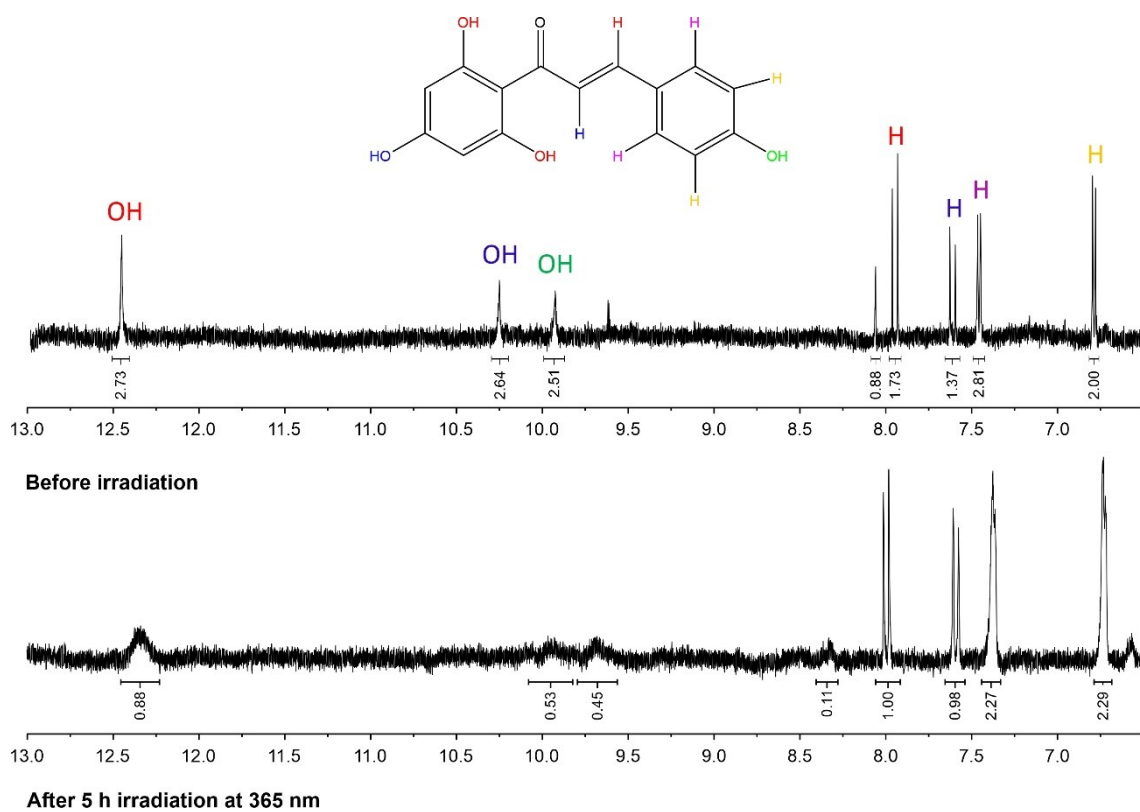

**Fig S8.** <sup>1</sup>H-NMR spectra of nch in ethanol before and after 5 h of continuous irradiation at 365 nm. Coupling constants are shown.

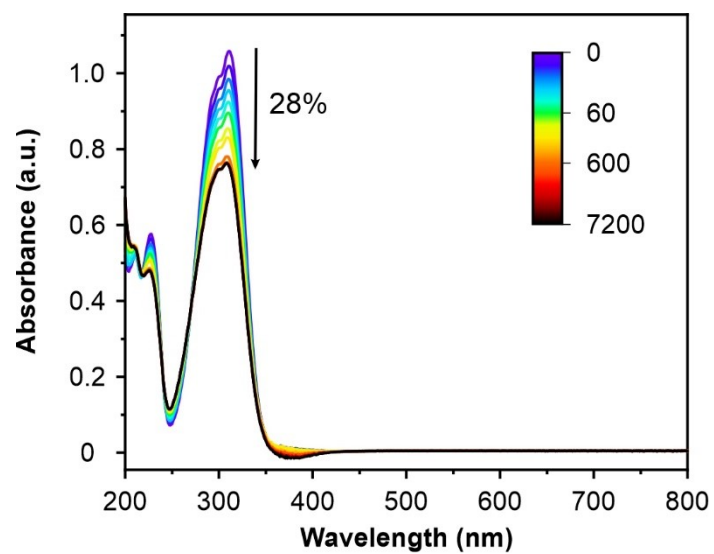

**Fig S9.** Photostability of a 1:1 mixture of **pca** and **nch** in ethanol after subtracting **nch** UV-Vis spectrum. The downwards arrow represents the absorbance difference before and after two hours of irradiation.

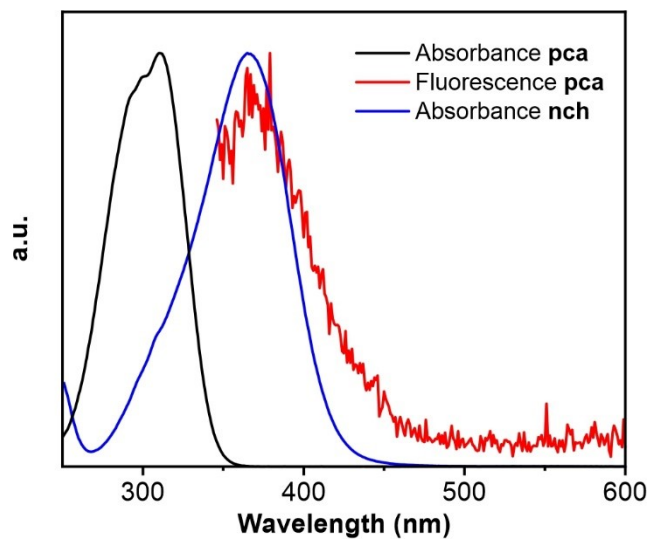

**Fig S10.** Absorbance spectra of **pca** (black line) and **nch** (blue line) and fluorescence spectrum of **pca** (red line) in ethanol.

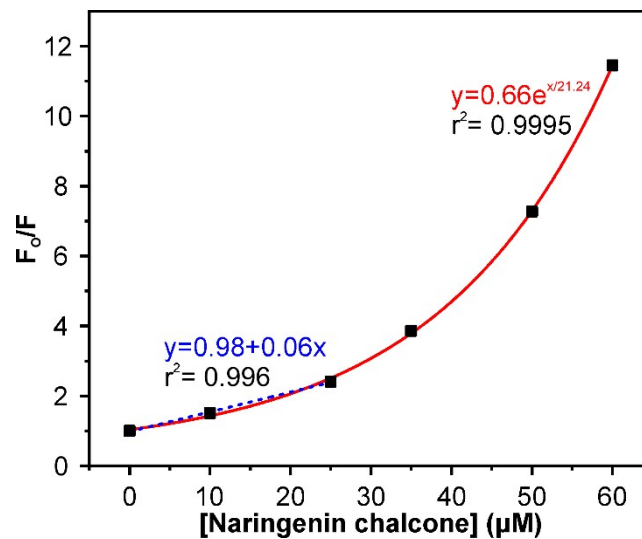

**Fig S11.** Stern-Volmer plot of the **pca** quenching by increasing concentrations of **nch**, where  $F_0$  and  $F$  are fluorescence emission intensities in absence and presence of the quencher (**nch**). At low concentrations a linear fit was reached, corresponding the slope of the line to  $K_{SV}$  (Stern-Volmer constant). At higher concentrations, data deviates from a linear to an exponential fit.

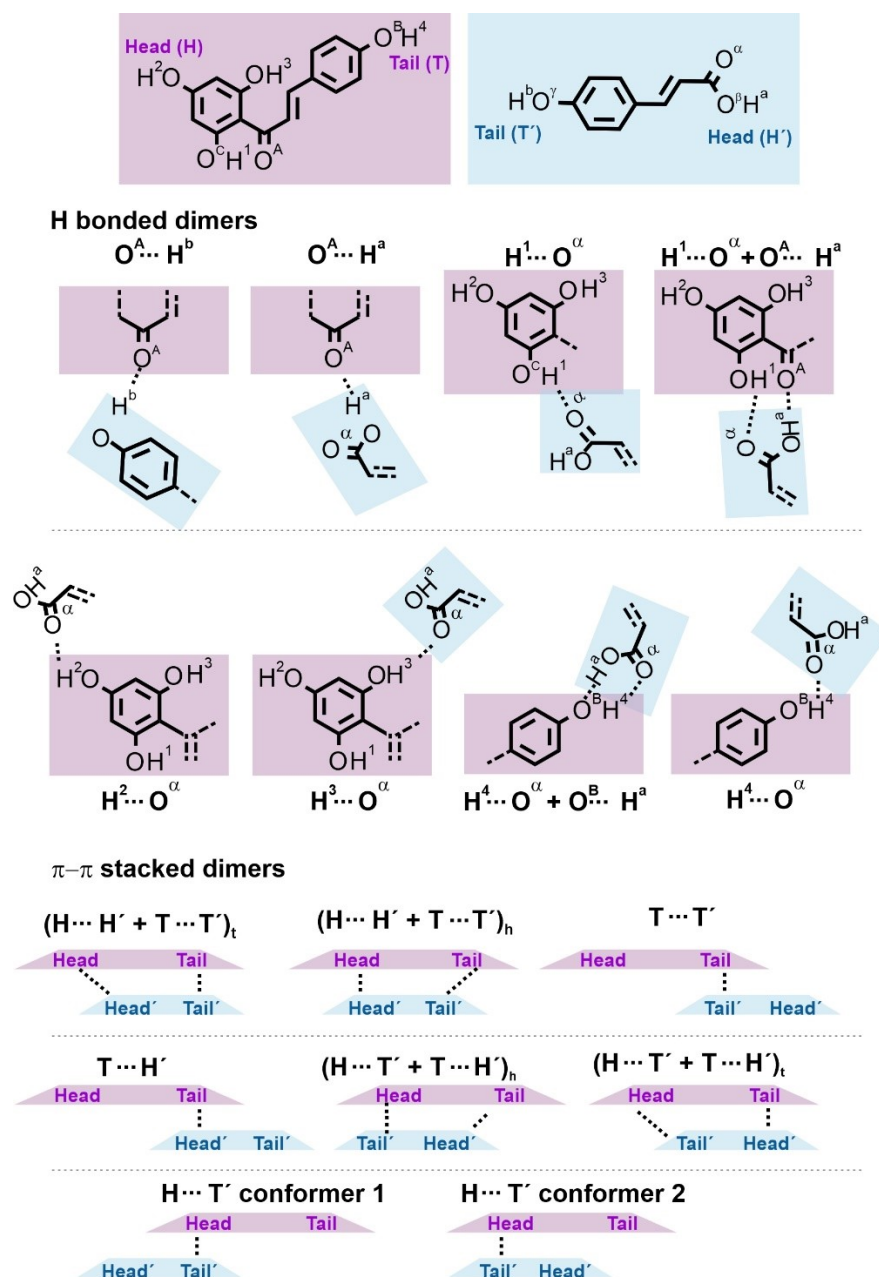

**Fig S12.** Schematic representation of all the **pca-nch** H-bonded and  $\pi$ - $\pi$  stacked heterodimers analysed.

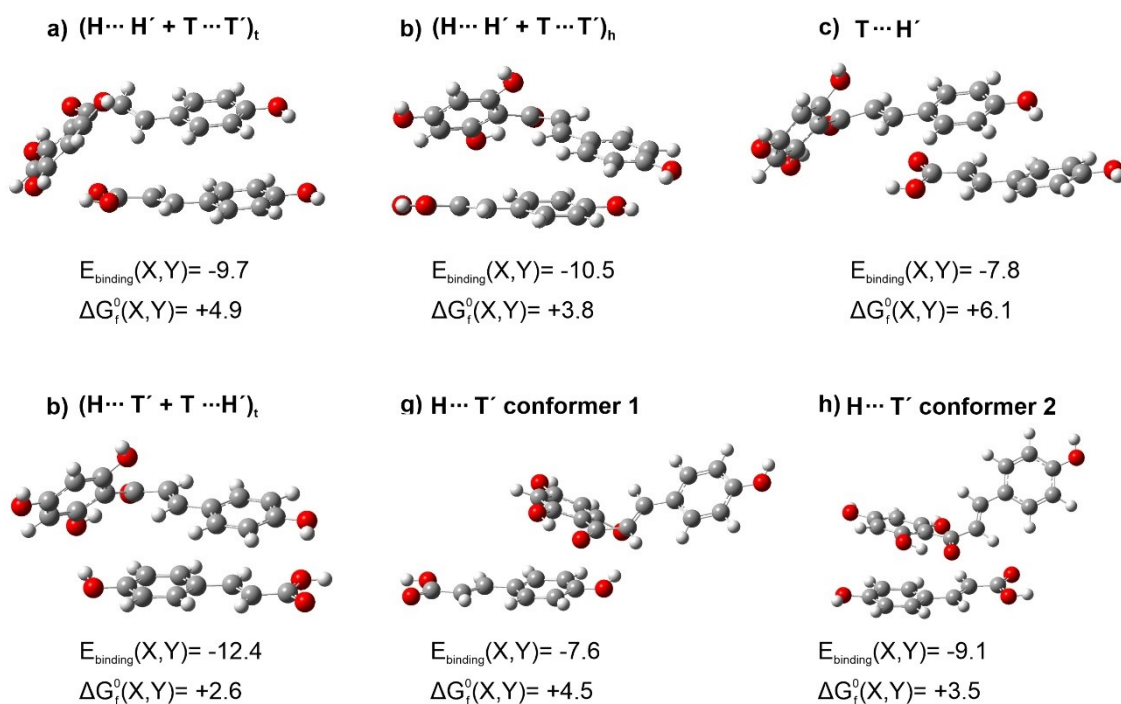

**Fig S13.** Geometries of the most stable **pca-nch**  $\pi$ - $\pi$  stacked heterodimers. Under each dimer, their respective binding energy ( $E_{\text{binding}}(X,Y)$ ) and binding free energies ( $\Delta G_f^0(X,Y)$ ) are shown. Energy values computed at the  $\omega$ B97XD(PCM, ethanol)/def2tzvp level are in kcal/mol. The nomenclature of the dimers is shown in FigS12.

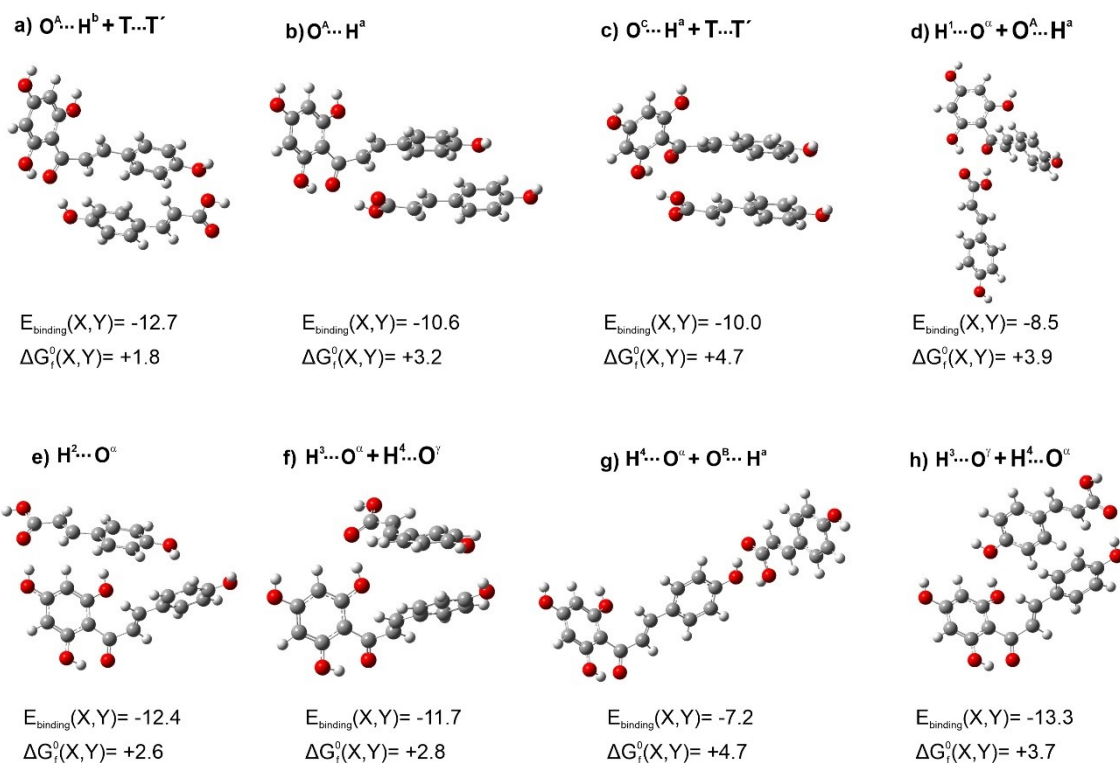

**Fig S14.** Geometries of the most stable **pca-nch** H-bonded heterodimers. Under each dimer, their respective binding energy ( $E_{\text{binding}}(X,Y)$ ) and binding free energies ( $\Delta G_f^0(X,Y)$ ) are shown. Energy values computed at the  $\omega$ B97XD(PCM, ethanol)/ def2-TZVP level are in kcal/mol. The nomenclature of the dimers is shown in FigS12.

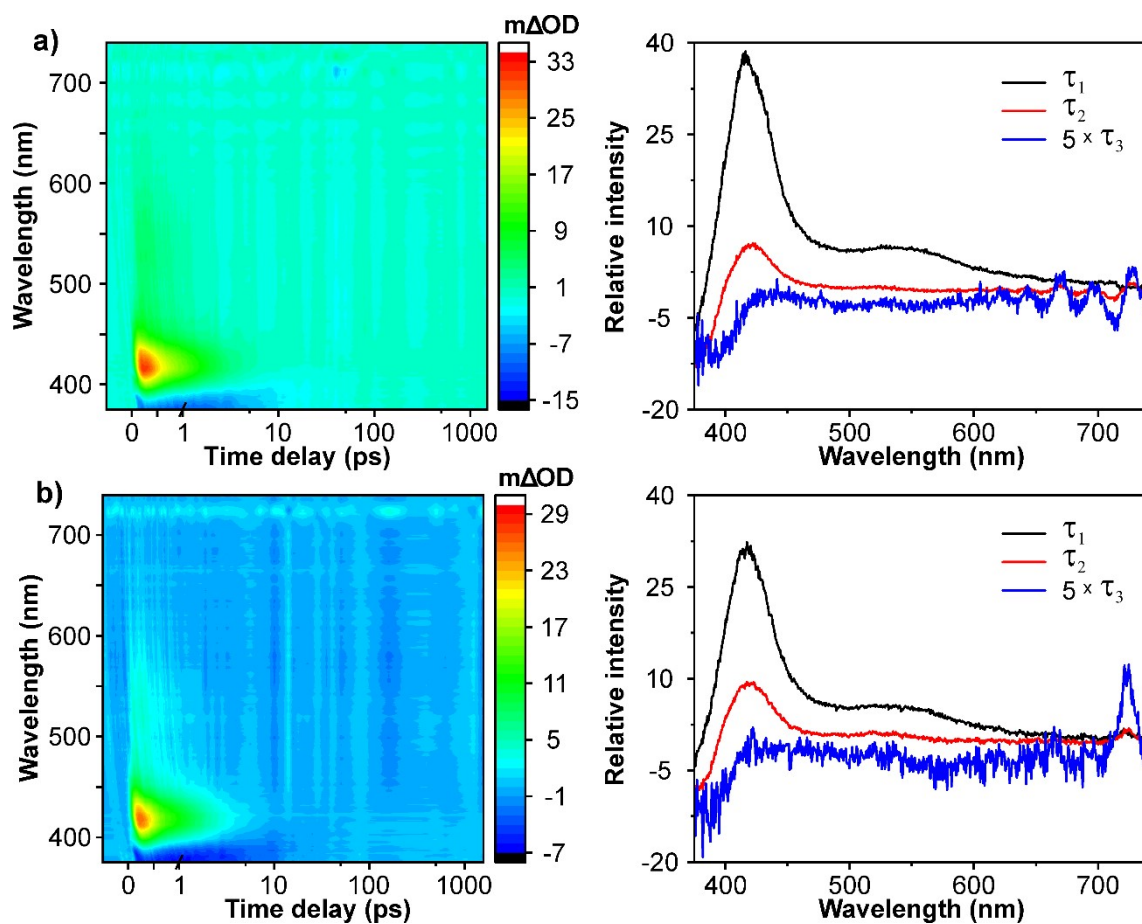

**Fig S15.** TAS (left) and evolutionary associated difference spectra (EADS) computed by sequential fit (right) of (a) 500  $\mu\text{M}$  **nch** and (c) a 1:1 mixture (500  $\mu\text{M}$ : 500  $\mu\text{M}$ ) of **nch** and **pca** in ethanol (excitation at 365 nm).



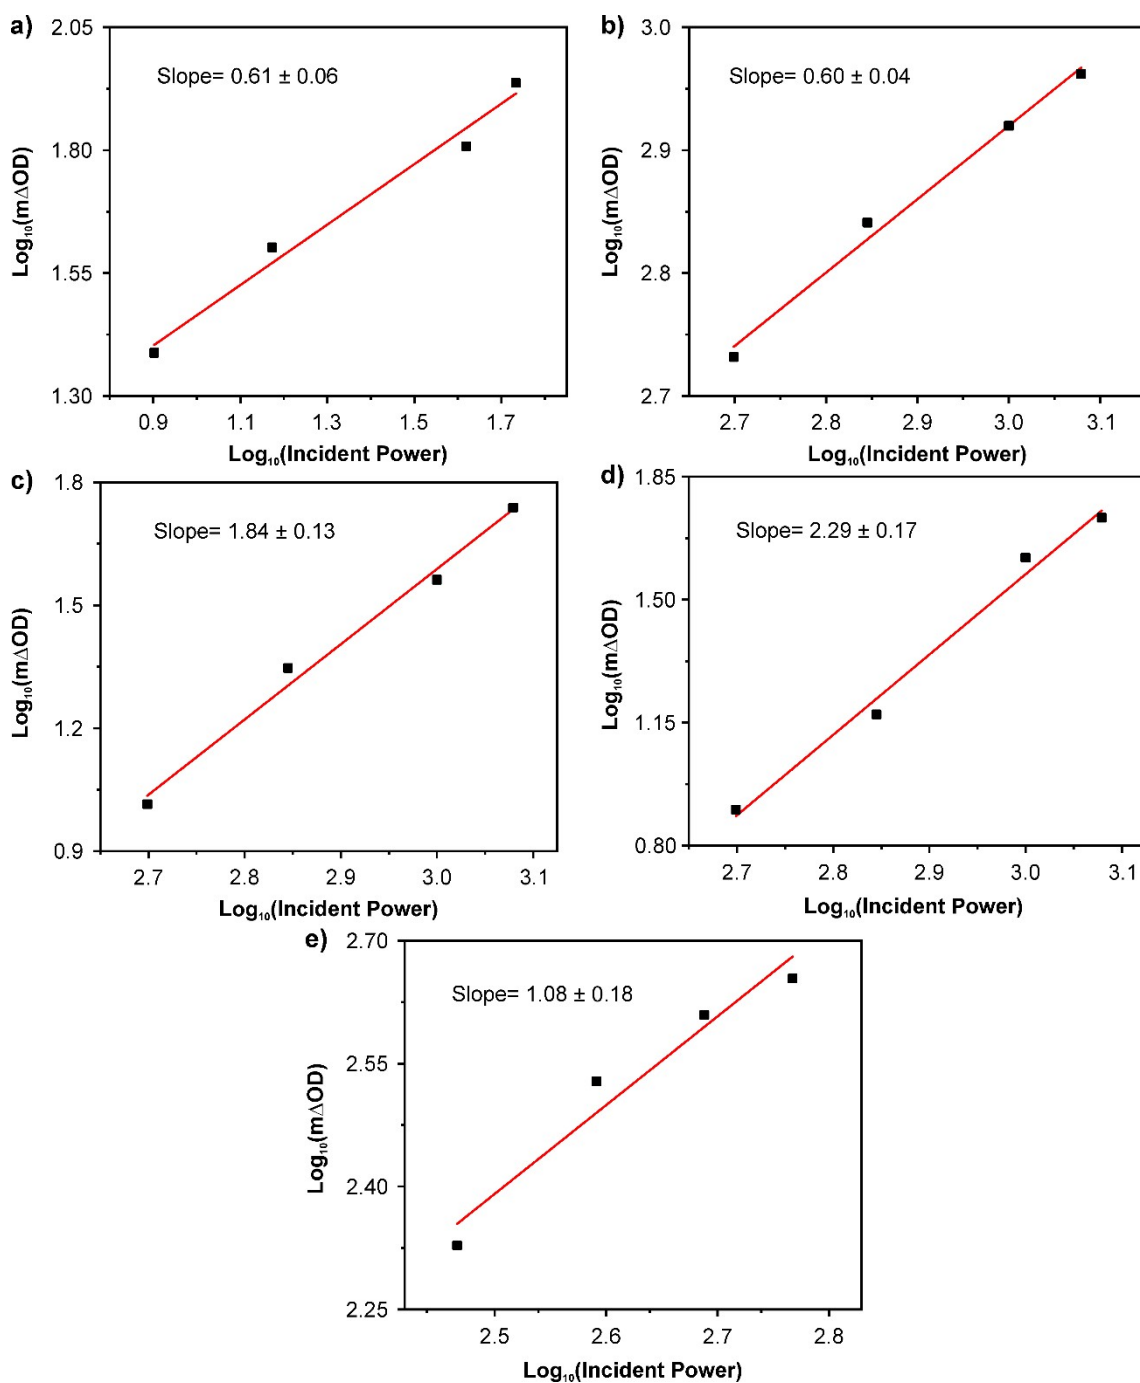

**Fig S16.** Power dependence studies of absorption bands of **pca** solution in ethanol excited at 312 nm at: (a) 335 (at time delay 1.8 ns), (b) 370 (at time delay 500 fs) (c) 390 (at time delay 1.8 ns) and (d) 625 nm (at time delay 1.8 ns). (e) Power dependence study of **nch** solution in ethanol (excited at 312 nm) at 420 nm (at time delay 500 fs).

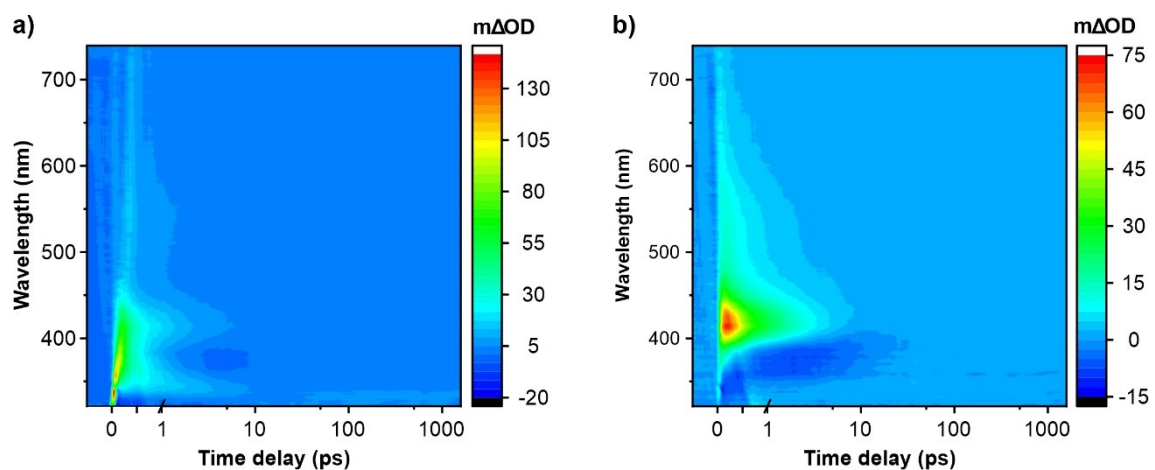

**Fig S17.** (a) Predicted TAS map for an equimolar mixture of **pca** and **nch** in ethanol calculated as manual sum of the TAS maps of their individual compounds. (b) Experimental TAS map of an equimolar **pca-nch** mixture in methanol.

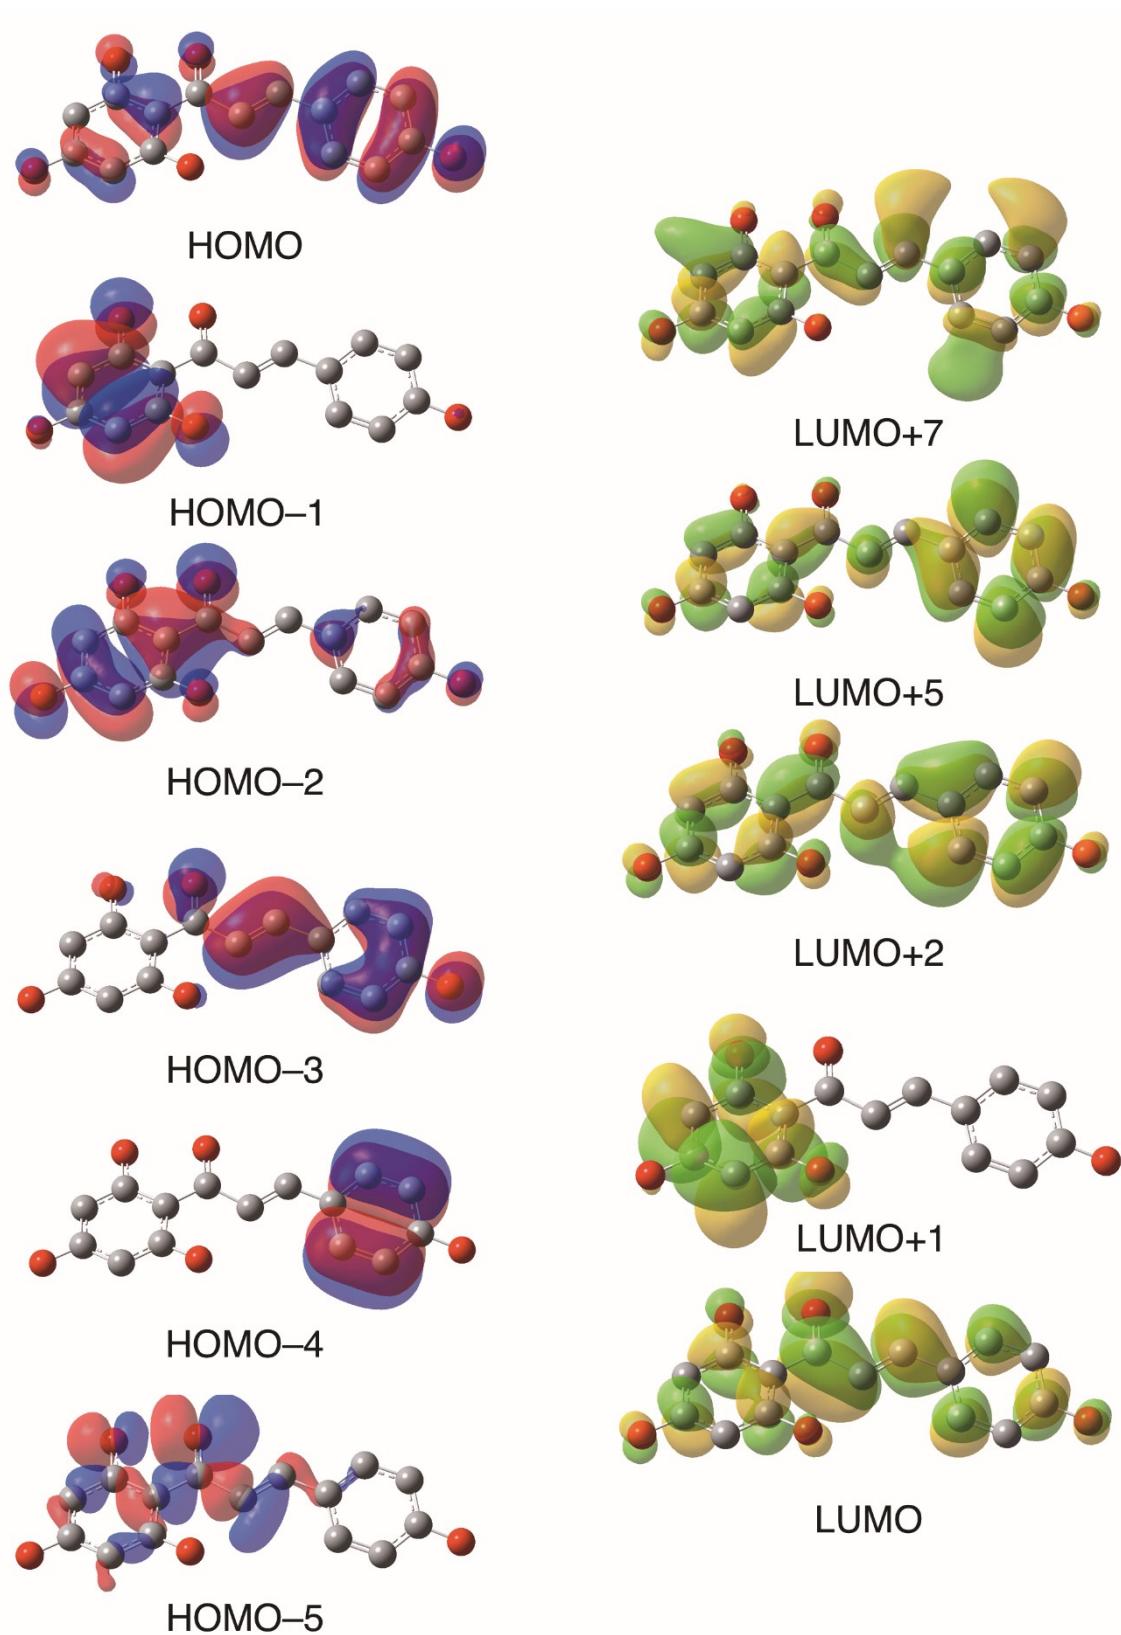

**Fig S18.** Frontier orbitals selected as active space in the CASSCF calculations of the conical intersections. Red/blue and green/yellow colors are used to represent occupied and virtual orbitals, respectively.

Cartesian coordinates (optimized at the B3LYP (PCM,ethanol)/def2-TZVP level) of all the stationary points collected in the main text associated with the absorption spectra calculation.

### pca

| Center Number | Atomic Number | Atomic Type | Coordinates (Angstroms) |           |           |
|---------------|---------------|-------------|-------------------------|-----------|-----------|
|               |               |             | X                       | Y         | Z         |
| 1             | 6             | 0           | 0.959497                | -1.074653 | -0.000285 |
| 2             | 6             | 0           | 2.330439                | -1.232156 | -0.000085 |
| 3             | 6             | 0           | 3.162777                | -0.107910 | 0.000259  |
| 4             | 6             | 0           | 2.605242                | 1.169843  | 0.000375  |
| 5             | 6             | 0           | 1.227371                | 1.313862  | 0.000163  |
| 6             | 6             | 0           | 0.371269                | 0.202895  | -0.000149 |
| 7             | 6             | 0           | -1.064547               | 0.425452  | -0.000303 |
| 8             | 6             | 0           | -2.037918               | -0.503053 | -0.000282 |
| 9             | 8             | 0           | 4.503051                | -0.324450 | 0.000432  |
| 10            | 6             | 0           | -3.464663               | -0.191635 | -0.000496 |
| 11            | 8             | 0           | -4.343042               | -1.034624 | 0.000108  |
| 12            | 8             | 0           | -3.755538               | 1.130903  | -0.000032 |
| 13            | 1             | 0           | 0.336814                | -1.959377 | -0.000564 |
| 14            | 1             | 0           | 2.777309                | -2.217613 | -0.000196 |
| 15            | 1             | 0           | 3.247449                | 2.042578  | 0.000623  |
| 16            | 1             | 0           | 0.801369                | 2.309781  | 0.000248  |
| 17            | 1             | 0           | -1.366966               | 1.467176  | -0.000448 |
| 18            | 1             | 0           | -1.826034               | -1.563599 | -0.000095 |
| 19            | 1             | 0           | 4.979332                | 0.516088  | 0.000883  |
| 20            | 1             | 0           | -4.721850               | 1.214462  | 0.000313  |

### nch

| Center Number | Atomic Number | Atomic Type | Coordinates (Angstroms) |           |           |
|---------------|---------------|-------------|-------------------------|-----------|-----------|
|               |               |             | X                       | Y         | Z         |
| 1             | 6             | 0           | -4.070173               | -1.387579 | -0.196443 |
| 2             | 6             | 0           | -4.233442               | -0.127045 | -0.752853 |
| 3             | 6             | 0           | -3.274151               | 0.848053  | -0.515503 |
| 4             | 6             | 0           | -2.081892               | 0.568821  | 0.218861  |
| 5             | 6             | 0           | -1.997839               | -0.710187 | 0.820207  |
| 6             | 6             | 0           | -2.969404               | -1.678414 | 0.609680  |
| 7             | 8             | 0           | -5.037328               | -2.305100 | -0.442292 |
| 8             | 8             | 0           | -3.501263               | 2.070846  | -1.023643 |
| 9             | 8             | 0           | -0.965695               | -0.963251 | 1.664329  |
| 10            | 6             | 0           | -1.063709               | 1.628989  | 0.317571  |
| 11            | 6             | 0           | 0.373997                | 1.383429  | 0.434022  |
| 12            | 6             | 0           | 1.014162                | 0.305155  | -0.050924 |
| 13            | 6             | 0           | 2.926427                | -1.098279 | -0.698567 |
| 14            | 6             | 0           | 2.449243                | 0.078450  | -0.102942 |
| 15            | 6             | 0           | 3.398827                | 0.974683  | 0.419728  |
| 16            | 6             | 0           | 4.751414                | 0.708209  | 0.350451  |
| 17            | 6             | 0           | 5.201400                | -0.472227 | -0.249720 |
| 18            | 6             | 0           | 4.281432                | -1.377724 | -0.775427 |
| 19            | 8             | 0           | 6.543290                | -0.680585 | -0.289885 |
| 20            | 8             | 0           | -1.418087               | 2.825468  | 0.214928  |
| 21            | 1             | 0           | -5.111166               | 0.109942  | -1.337026 |
| 22            | 1             | 0           | -2.881865               | -2.646705 | 1.088982  |
| 23            | 1             | 0           | -4.832366               | -3.138428 | 0.001055  |
| 24            | 1             | 0           | -2.804953               | 2.662859  | -0.633293 |
| 25            | 1             | 0           | -1.050627               | -1.855067 | 2.025152  |
| 26            | 1             | 0           | 0.922593                | 2.241287  | 0.805044  |
| 27            | 1             | 0           | 0.417138                | -0.494547 | -0.474285 |
| 28            | 1             | 0           | 2.218257                | -1.807384 | -1.109789 |
| 29            | 1             | 0           | 3.075845                | 1.894107  | 0.889538  |
| 30            | 1             | 0           | 5.476158                | 1.402187  | 0.755525  |
| 31            | 1             | 0           | 4.625737                | -2.293671 | -1.240664 |
| 32            | 1             | 0           | 6.740159                | -1.519609 | -0.726597 |

Cartesian coordinates (optimized at the  $\omega$ B97XD(PCM,ethanol)/6-31+G(d,p) level) of all the stationary points collected in the main text associated with the  $S_0$  and  $S_1$  surface exploration for **nch**.

### s-trans- $S_0$

| Center Number | Atomic Number | Atomic Type | Coordinates (Angstroms) |           |           |
|---------------|---------------|-------------|-------------------------|-----------|-----------|
|               |               |             | X                       | Y         | Z         |
| 1             | 6             | 0           | 5.282215                | 0.800096  | 0.162081  |
| 2             | 6             | 0           | 3.975556                | 1.265737  | 0.249774  |
| 3             | 6             | 0           | 2.878138                | 0.417971  | 0.041891  |
| 4             | 6             | 0           | 3.137332                | -0.931097 | -0.260741 |
| 5             | 6             | 0           | 4.433390                | -1.409323 | -0.351047 |
| 6             | 6             | 0           | 5.512339                | -0.543108 | -0.139650 |
| 7             | 6             | 0           | 1.530030                | 0.971663  | 0.148341  |
| 8             | 6             | 0           | 0.367734                | 0.306256  | 0.006519  |
| 9             | 6             | 0           | -0.912478               | 1.023643  | 0.118040  |
| 10            | 8             | 0           | -0.902031               | 2.276154  | 0.169265  |
| 11            | 8             | 0           | 6.758860                | -1.069223 | -0.242793 |
| 12            | 6             | 0           | -2.204509               | 0.319043  | 0.098346  |
| 13            | 6             | 0           | -3.391597               | 1.079831  | -0.148962 |
| 14            | 6             | 0           | -4.639491               | 0.478145  | -0.281767 |
| 15            | 6             | 0           | -4.747622               | -0.897469 | -0.131353 |
| 16            | 6             | 0           | -3.628021               | -1.681848 | 0.163623  |
| 17            | 6             | 0           | -2.383527               | -1.078257 | 0.284059  |
| 18            | 8             | 0           | -5.978792               | -1.437811 | -0.262967 |
| 19            | 8             | 0           | -3.345421               | 2.409768  | -0.278659 |
| 20            | 8             | 0           | -1.308360               | -1.827804 | 0.620059  |
| 21            | 1             | 0           | -5.512761               | 1.085438  | -0.486043 |
| 22            | 1             | 0           | -3.731348               | -2.752114 | 0.316589  |
| 23            | 1             | 0           | -5.951066               | -2.392580 | -0.134192 |
| 24            | 1             | 0           | -2.400729               | 2.671170  | -0.098799 |
| 25            | 1             | 0           | -1.560444               | -2.753000 | 0.715145  |
| 26            | 1             | 0           | 0.339279                | -0.754551 | -0.193445 |
| 27            | 1             | 0           | 1.473200                | 2.035459  | 0.372420  |
| 28            | 1             | 0           | 3.804374                | 2.312492  | 0.484591  |
| 29            | 1             | 0           | 2.317231                | -1.621297 | -0.429957 |
| 30            | 1             | 0           | 4.628533                | -2.450335 | -0.585247 |
| 31            | 1             | 0           | 6.116408                | 1.475963  | 0.326805  |
| 32            | 1             | 0           | 7.426335                | -0.393031 | -0.082023 |

### TS- $S_0$

| Center Number | Atomic Number | Atomic Type | Coordinates (Angstroms) |           |           |
|---------------|---------------|-------------|-------------------------|-----------|-----------|
|               |               |             | X                       | Y         | Z         |
| 1             | 6             | 0           | -2.606130               | -1.132563 | 0.213171  |
| 2             | 6             | 0           | -1.978353               | 0.127743  | 0.227373  |
| 3             | 6             | 0           | -2.785461               | 1.235115  | -0.168226 |
| 4             | 6             | 0           | -4.125818               | 1.079055  | -0.534950 |
| 5             | 6             | 0           | -4.693751               | -0.185994 | -0.522223 |
| 6             | 6             | 0           | -3.942924               | -1.301057 | -0.152622 |
| 7             | 6             | 0           | -0.557257               | 0.387511  | 0.626490  |
| 8             | 8             | 0           | -0.127549               | 1.621159  | 0.474475  |
| 9             | 8             | 0           | -2.272176               | 2.469264  | -0.198389 |
| 10            | 8             | 0           | -6.001802               | -0.290619 | -0.886158 |
| 11            | 8             | 0           | -1.877686               | -2.227786 | 0.566381  |
| 12            | 6             | 0           | 0.290233                | -0.557591 | 1.138280  |
| 13            | 6             | 0           | 1.624027                | -0.125095 | 1.542455  |
| 14            | 6             | 0           | 2.755764                | -0.137889 | 0.748045  |
| 15            | 6             | 0           | 4.011180                | 0.297297  | 1.279467  |
| 16            | 6             | 0           | 5.138232                | 0.305967  | 0.504176  |
| 17            | 6             | 0           | 5.045873                | -0.122696 | -0.840809 |
| 18            | 6             | 0           | 3.819279                | -0.555990 | -1.398548 |
| 19            | 6             | 0           | 2.698887                | -0.563075 | -0.617982 |
| 20            | 8             | 0           | 6.096505                | -0.142286 | -1.645385 |
| 21            | 1             | 0           | -4.706588               | 1.946263  | -0.827590 |

|    |   |   |           |           |           |
|----|---|---|-----------|-----------|-----------|
| 22 | 1 | 0 | -4.388372 | -2.292384 | -0.149691 |
| 23 | 1 | 0 | -6.289262 | -1.208663 | -0.839677 |
| 24 | 1 | 0 | -1.269163 | 2.317350  | 0.077856  |
| 25 | 1 | 0 | -2.427660 | -3.016811 | 0.517062  |
| 26 | 1 | 0 | 0.008446  | -1.583185 | 1.336136  |
| 27 | 1 | 0 | 1.776422  | 0.230470  | 2.567595  |
| 28 | 1 | 0 | 4.061817  | 0.624349  | 2.313289  |
| 29 | 1 | 0 | 1.741456  | -0.886429 | -1.012728 |
| 30 | 1 | 0 | 3.800357  | -0.871176 | -2.434959 |
| 31 | 1 | 0 | 6.091877  | 0.634724  | 0.903261  |
| 32 | 1 | 0 | 6.899652  | 0.163214  | -1.202534 |

### s-cis-S<sub>0</sub>

| Center<br>Number | Atomic<br>Number | Atomic<br>Type | Coordinates (Angstroms) |           |           |
|------------------|------------------|----------------|-------------------------|-----------|-----------|
|                  |                  |                | X                       | Y         | Z         |
| 1                | 6                | 0              | 0.685336                | 2.528799  | 0.543895  |
| 2                | 6                | 0              | 1.491383                | 2.233129  | -0.549116 |
| 3                | 6                | 0              | 1.987676                | 0.941824  | -0.690868 |
| 4                | 6                | 0              | 1.641334                | -0.096300 | 0.221349  |
| 5                | 6                | 0              | 0.879246                | 0.274701  | 1.356837  |
| 6                | 6                | 0              | 0.397194                | 1.565928  | 1.517511  |
| 7                | 8                | 0              | 0.222366                | 3.794375  | 0.640188  |
| 8                | 8                | 0              | 2.770823                | 0.700463  | -1.752243 |
| 9                | 8                | 0              | 0.669205                | -0.658404 | 2.308518  |
| 10               | 6                | 0              | 1.984661                | -1.475988 | -0.134058 |
| 11               | 6                | 0              | 1.203748                | -2.655909 | 0.317325  |
| 12               | 6                | 0              | -0.130681               | -2.788599 | 0.320810  |
| 13               | 6                | 0              | -2.267414               | -1.591871 | 0.720969  |
| 14               | 6                | 0              | -1.132671               | -1.782268 | -0.075487 |
| 15               | 6                | 0              | -0.988871               | -0.987164 | -1.220787 |
| 16               | 6                | 0              | -1.916719               | -0.004616 | -1.537074 |
| 17               | 6                | 0              | -3.019995               | 0.197405  | -0.705787 |
| 18               | 6                | 0              | -3.201252               | -0.605097 | 0.422564  |
| 19               | 8                | 0              | -3.893780               | 1.181427  | -1.053228 |
| 20               | 8                | 0              | 2.936609                | -1.703048 | -0.907298 |
| 21               | 1                | 0              | 1.741104                | 2.995326  | -1.276956 |
| 22               | 1                | 0              | -0.178682               | 1.828522  | 2.400121  |
| 23               | 1                | 0              | -0.327549               | 3.899820  | 1.424679  |
| 24               | 1                | 0              | 3.093720                | -0.227695 | -1.667320 |
| 25               | 1                | 0              | 0.097086                | -0.307667 | 2.999946  |
| 26               | 1                | 0              | 1.820506                | -3.513263 | 0.573591  |
| 27               | 1                | 0              | -0.528876               | -3.740538 | 0.668535  |
| 28               | 1                | 0              | -2.412478               | -2.207935 | 1.603898  |
| 29               | 1                | 0              | -0.143041               | -1.144246 | -1.883161 |
| 30               | 1                | 0              | -1.797744               | 0.608380  | -2.424156 |
| 31               | 1                | 0              | -4.066452               | -0.461212 | 1.063545  |
| 32               | 1                | 0              | -4.617222               | 1.228169  | -0.418705 |

### s-trans-S<sub>1</sub>

| Center<br>Number | Atomic<br>Number | Atomic<br>Type | Coordinates (Angstroms) |           |           |
|------------------|------------------|----------------|-------------------------|-----------|-----------|
|                  |                  |                | X                       | Y         | Z         |
| 1                | 6                | 0              | 5.290273                | 0.814239  | -0.038500 |
| 2                | 6                | 0              | 4.023234                | 1.330986  | 0.017841  |
| 3                | 6                | 0              | 2.858812                | 0.485784  | 0.019124  |
| 4                | 6                | 0              | 3.086326                | -0.936318 | -0.027653 |
| 5                | 6                | 0              | 4.356185                | -1.452351 | -0.085341 |
| 6                | 6                | 0              | 5.470104                | -0.588017 | -0.096617 |
| 7                | 6                | 0              | 1.581646                | 1.067458  | 0.063062  |
| 8                | 6                | 0              | 0.367434                | 0.339487  | 0.071868  |
| 9                | 6                | 0              | -0.889484               | 1.002641  | 0.137052  |
| 10               | 8                | 0              | -0.901530               | 2.302011  | 0.193209  |
| 11               | 8                | 0              | 6.680628                | -1.152793 | -0.163431 |
| 12               | 6                | 0              | -2.172960               | 0.291903  | 0.083829  |
| 13               | 6                | 0              | -3.370890               | 1.082954  | -0.072841 |
| 14               | 6                | 0              | -4.633760               | 0.504639  | -0.185781 |
| 15               | 6                | 0              | -4.755990               | -0.875638 | -0.126253 |

|    |   |   |           |           |           |
|----|---|---|-----------|-----------|-----------|
| 16 | 6 | 0 | -3.629339 | -1.690554 | 0.054694  |
| 17 | 6 | 0 | -2.371316 | -1.115031 | 0.163535  |
| 18 | 8 | 0 | -5.999584 | -1.397335 | -0.239647 |
| 19 | 8 | 0 | -3.279706 | 2.406994  | -0.120392 |
| 20 | 8 | 0 | -1.288459 | -1.909637 | 0.364650  |
| 21 | 1 | 0 | -5.505139 | 1.135960  | -0.312430 |
| 22 | 1 | 0 | -3.738909 | -2.769758 | 0.119845  |
| 23 | 1 | 0 | -5.975311 | -2.359081 | -0.183442 |
| 24 | 1 | 0 | -2.260616 | 2.600381  | 0.019099  |
| 25 | 1 | 0 | -1.554399 | -2.835131 | 0.395500  |
| 26 | 1 | 0 | 0.378412  | -0.738436 | 0.019454  |
| 27 | 1 | 0 | 1.513765  | 2.150483  | 0.099303  |
| 28 | 1 | 0 | 3.883564  | 2.406627  | 0.060137  |
| 29 | 1 | 0 | 2.244208  | -1.618330 | -0.020285 |
| 30 | 1 | 0 | 4.526103  | -2.522738 | -0.124634 |
| 31 | 1 | 0 | 6.155610  | 1.470166  | -0.038854 |
| 32 | 1 | 0 | 7.380272  | -0.487155 | -0.176915 |

### TS-S<sub>1</sub>

| Center<br>Number | Atomic<br>Number | Atomic<br>Type | Coordinates (Angstroms) |           |           |
|------------------|------------------|----------------|-------------------------|-----------|-----------|
|                  |                  |                | X                       | Y         | Z         |
| 1                | 6                | 0              | -2.395970               | -1.106275 | 0.233305  |
| 2                | 6                | 0              | -2.095812               | 0.263511  | 0.012348  |
| 3                | 6                | 0              | -3.208668               | 1.102627  | -0.325865 |
| 4                | 6                | 0              | -4.514248               | 0.618043  | -0.370400 |
| 5                | 6                | 0              | -4.749146               | -0.724673 | -0.108575 |
| 6                | 6                | 0              | -3.694700               | -1.596072 | 0.185304  |
| 7                | 6                | 0              | -0.761744               | 0.880874  | 0.105250  |
| 8                | 8                | 0              | -0.608230               | 2.089732  | -0.324701 |
| 9                | 8                | 0              | -3.015820               | 2.394601  | -0.600040 |
| 10               | 8                | 0              | -6.031951               | -1.154113 | -0.165119 |
| 11               | 8                | 0              | -1.368922               | -1.956931 | 0.481873  |
| 12               | 6                | 0              | 0.337927                | 0.242519  | 0.731792  |
| 13               | 6                | 0              | 1.591093                | 0.939151  | 0.892364  |
| 14               | 6                | 0              | 2.823347                | 0.426400  | 0.480721  |
| 15               | 6                | 0              | 4.023258                | 1.196913  | 0.627969  |
| 16               | 6                | 0              | 5.237464                | 0.715268  | 0.207548  |
| 17               | 6                | 0              | 5.313508                | -0.561073 | -0.391647 |
| 18               | 6                | 0              | 4.157192                | -1.345909 | -0.553694 |
| 19               | 6                | 0              | 2.941319                | -0.868663 | -0.126205 |
| 20               | 8                | 0              | 6.472388                | -1.086091 | -0.816245 |
| 21               | 1                | 0              | -5.329998               | 1.287044  | -0.617022 |
| 22               | 1                | 0              | -3.884423               | -2.652061 | 0.356759  |
| 23               | 1                | 0              | -6.085477               | -2.095959 | 0.031619  |
| 24               | 1                | 0              | -2.002273               | 2.519071  | -0.567441 |
| 25               | 1                | 0              | -1.703270               | -2.847863 | 0.633013  |
| 26               | 1                | 0              | 0.215094                | -0.752443 | 1.144916  |
| 27               | 1                | 0              | 1.570518                | 1.949209  | 1.303395  |
| 28               | 1                | 0              | 3.962187                | 2.181512  | 1.081498  |
| 29               | 1                | 0              | 2.051183                | -1.479161 | -0.241354 |
| 30               | 1                | 0              | 4.249025                | -2.327150 | -1.006450 |
| 31               | 1                | 0              | 6.138549                | 1.308912  | 0.330262  |
| 32               | 1                | 0              | 7.210236                | -0.484535 | -0.656631 |

### s-cis-S<sub>1</sub>

| Center<br>Number | Atomic<br>Number | Atomic<br>Type | Coordinates (Angstroms) |           |           |
|------------------|------------------|----------------|-------------------------|-----------|-----------|
|                  |                  |                | X                       | Y         | Z         |
| 1                | 6                | 0              | -2.308871               | -1.014896 | 0.473089  |
| 2                | 6                | 0              | -1.969830               | 0.303243  | 0.086446  |
| 3                | 6                | 0              | -2.993531               | 1.068274  | -0.543361 |
| 4                | 6                | 0              | -4.289053               | 0.580907  | -0.687673 |
| 5                | 6                | 0              | -4.581111               | -0.704352 | -0.249023 |
| 6                | 6                | 0              | -3.595088               | -1.517015 | 0.318098  |
| 7                | 6                | 0              | -0.646000               | 0.924257  | 0.299603  |
| 8                | 8                | 0              | -0.336667               | 1.961989  | -0.336869 |
| 9                | 8                | 0              | -2.750719               | 2.301327  | -1.010462 |
| 10               | 8                | 0              | -5.851414               | -1.137373 | -0.414839 |

|    |   |   |           |           |           |
|----|---|---|-----------|-----------|-----------|
| 11 | 8 | 0 | -1.329005 | -1.803459 | 0.976119  |
| 12 | 6 | 0 | 0.295047  | 0.428267  | 1.280249  |
| 13 | 6 | 0 | 1.616287  | 0.993038  | 1.375364  |
| 14 | 6 | 0 | 2.742410  | 0.430576  | 0.690380  |
| 15 | 6 | 0 | 4.028742  | 0.994855  | 0.833966  |
| 16 | 6 | 0 | 5.124198  | 0.468584  | 0.170778  |
| 17 | 6 | 0 | 4.966997  | -0.647078 | -0.661304 |
| 18 | 6 | 0 | 3.709174  | -1.224957 | -0.821856 |
| 19 | 6 | 0 | 2.612887  | -0.692589 | -0.156003 |
| 20 | 8 | 0 | 6.009517  | -1.207551 | -1.335852 |
| 21 | 1 | 0 | -5.050093 | 1.194563  | -1.153934 |
| 22 | 1 | 0 | -3.823453 | -2.535318 | 0.618606  |
| 23 | 1 | 0 | -5.953962 | -2.035857 | -0.081834 |
| 24 | 1 | 0 | -1.777586 | 2.454234  | -0.913430 |
| 25 | 1 | 0 | -1.679338 | -2.671692 | 1.203965  |
| 26 | 1 | 0 | -0.031645 | -0.341614 | 1.973207  |
| 27 | 1 | 0 | 1.780229  | 1.860148  | 2.014231  |
| 28 | 1 | 0 | 4.161223  | 1.859686  | 1.477122  |
| 29 | 1 | 0 | 1.638731  | -1.152881 | -0.290703 |
| 30 | 1 | 0 | 3.599601  | -2.088412 | -1.469322 |
| 31 | 1 | 0 | 6.104166  | 0.920486  | 0.295710  |
| 32 | 1 | 0 | 6.824881  | -0.729482 | -1.150916 |

-----

Cartesian coordinates of conical intersection computed at CASSCF(12,11)(PCM,ethanol)/6-31+G(d,p) level of theory for nch.

## CI

| Center Number | Atomic Number | Atomic Type | Coordinates (Angstroms) |           |           |
|---------------|---------------|-------------|-------------------------|-----------|-----------|
|               |               |             | X                       | Y         | Z         |
| 1             | 6             | 0           | 2.962635                | -0.823104 | -0.171231 |
| 2             | 6             | 0           | 2.847466                | 0.447823  | 0.430825  |
| 3             | 6             | 0           | 4.027365                | 1.204807  | 0.604256  |
| 4             | 6             | 0           | 5.258566                | 0.719744  | 0.199354  |
| 5             | 6             | 0           | 5.345541                | -0.548743 | -0.388282 |
| 6             | 6             | 0           | 4.197703                | -1.316910 | -0.572956 |
| 7             | 6             | 0           | 1.598208                | 0.900171  | 1.018499  |
| 8             | 6             | 0           | 0.334166                | 0.253844  | 0.874599  |
| 9             | 6             | 0           | -0.774760               | 0.854382  | 0.013550  |
| 10            | 8             | 0           | -0.579091               | 1.986899  | -0.493839 |
| 11            | 8             | 0           | 6.532457                | -1.089876 | -0.778184 |
| 12            | 6             | 0           | -2.127915               | 0.259181  | -0.040674 |
| 13            | 6             | 0           | -2.411800               | -1.105184 | 0.192258  |
| 14            | 6             | 0           | -3.711324               | -1.599313 | 0.172231  |
| 15            | 6             | 0           | -4.770351               | -0.723933 | -0.084892 |
| 16            | 6             | 0           | -4.544992               | 0.626744  | -0.322355 |
| 17            | 6             | 0           | -3.238862               | 1.107403  | -0.314570 |
| 18            | 8             | 0           | -1.367881               | -1.939574 | 0.412462  |
| 19            | 8             | 0           | -3.065495               | 2.414468  | -0.560003 |
| 20            | 8             | 0           | -6.053281               | -1.150776 | -0.127678 |
| 21            | 1             | 0           | -5.368763               | 1.297804  | -0.533386 |
| 22            | 1             | 0           | -3.896663               | -2.656878 | 0.335644  |
| 23            | 1             | 0           | -6.105564               | -2.099073 | 0.036931  |
| 24            | 1             | 0           | -2.087946               | 2.558226  | -0.620027 |
| 25            | 1             | 0           | -1.686671               | -2.834700 | 0.575484  |
| 26            | 1             | 0           | 0.037972                | -0.516843 | 1.583876  |
| 27            | 1             | 0           | 1.671187                | 1.691289  | 1.765726  |
| 28            | 1             | 0           | 3.970876                | 2.179722  | 1.080347  |
| 29            | 1             | 0           | 2.083069                | -1.452645 | -0.268321 |
| 30            | 1             | 0           | 4.288107                | -2.311108 | -0.998511 |
| 31            | 1             | 0           | 6.156072                | 1.313245  | 0.352766  |
| 32            | 1             | 0           | 7.254785                | -0.479632 | -0.596273 |

-----



Cartesian coordinates (optimized at the  $\omega$ B97XD(PCM, ethanol)/def2-TZVP level) of all the stationary points associated to **pca-nch** heterodimers.

**pca**

| Center Number | Atomic Number | Atomic Type | Coordinates (Angstroms) |           |           |
|---------------|---------------|-------------|-------------------------|-----------|-----------|
|               |               |             | X                       | Y         | Z         |
| 1             | 6             | 0           | 0.955425                | -1.068962 | -0.000335 |
| 2             | 6             | 0           | 2.323693                | -1.228586 | -0.000219 |
| 3             | 6             | 0           | 3.155166                | -0.109003 | 0.000170  |
| 4             | 6             | 0           | 2.600127                | 1.165578  | 0.000412  |
| 5             | 6             | 0           | 1.224668                | 1.310248  | 0.000282  |
| 6             | 6             | 0           | 0.373721                | 0.204333  | -0.000069 |
| 7             | 6             | 0           | -1.067216               | 0.426772  | -0.000131 |
| 8             | 6             | 0           | -2.027979               | -0.502903 | 0.000035  |
| 9             | 8             | 0           | 4.488251                | -0.324639 | 0.000263  |
| 10            | 6             | 0           | -3.459099               | -0.188680 | -0.000029 |
| 11            | 8             | 0           | -4.330513               | -1.030224 | 0.000027  |
| 12            | 8             | 0           | -3.743230               | 1.122432  | -0.000404 |
| 13            | 1             | 0           | 0.331992                | -1.953704 | -0.000661 |
| 14            | 1             | 0           | 2.768043                | -2.215213 | -0.000435 |
| 15            | 1             | 0           | 3.241682                | 2.038764  | 0.000694  |
| 16            | 1             | 0           | 0.800290                | 2.307196  | 0.000466  |
| 17            | 1             | 0           | -1.372953               | 1.468132  | -0.000298 |
| 18            | 1             | 0           | -1.814131               | -1.563394 | 0.000248  |
| 19            | 1             | 0           | 4.961996                | 0.511497  | 0.000701  |
| 20            | 1             | 0           | -4.704018               | 1.213400  | -0.000495 |

**nch**

| Center Number | Atomic Number | Atomic Type | Coordinates (Angstroms) |           |           |
|---------------|---------------|-------------|-------------------------|-----------|-----------|
|               |               |             | X                       | Y         | Z         |
| 1             | 6             | 0           | -3.966594               | -1.438891 | -0.185037 |
| 2             | 6             | 0           | -4.149159               | -0.209192 | -0.794614 |
| 3             | 6             | 0           | -3.234170               | 0.803702  | -0.558661 |
| 4             | 6             | 0           | -2.073497               | 0.591183  | 0.230270  |
| 5             | 6             | 0           | -1.966540               | -0.654527 | 0.882357  |
| 6             | 6             | 0           | -2.892863               | -1.662069 | 0.672333  |
| 7             | 8             | 0           | -4.885834               | -2.391924 | -0.431481 |
| 8             | 8             | 0           | -3.477227               | 1.990163  | -1.126040 |
| 9             | 8             | 0           | -0.963760               | -0.832156 | 1.765195  |
| 10            | 6             | 0           | -1.083784               | 1.678930  | 0.319777  |
| 11            | 6             | 0           | 0.358299                | 1.439141  | 0.439044  |
| 12            | 6             | 0           | 0.970099                | 0.360752  | -0.058502 |
| 13            | 6             | 0           | 2.853925                | -1.073399 | -0.712059 |
| 14            | 6             | 0           | 2.404407                | 0.103683  | -0.112713 |
| 15            | 6             | 0           | 3.363902                | 0.975413  | 0.415238  |
| 16            | 6             | 0           | 4.708885                | 0.683836  | 0.346883  |
| 17            | 6             | 0           | 5.135360                | -0.498112 | -0.257606 |
| 18            | 6             | 0           | 4.200831                | -1.379229 | -0.788790 |
| 19            | 8             | 0           | 6.465538                | -0.732837 | -0.296776 |
| 20            | 8             | 0           | -1.454021               | 2.854752  | 0.199516  |
| 21            | 1             | 0           | -5.009282               | -0.025925 | -1.422635 |
| 22            | 1             | 0           | -2.793162               | -2.608211 | 1.191352  |
| 23            | 1             | 0           | -4.672045               | -3.197533 | 0.046791  |
| 24            | 1             | 0           | -2.835886               | 2.625138  | -0.737919 |
| 25            | 1             | 0           | -1.014131               | -1.712753 | 2.146197  |
| 26            | 1             | 0           | 0.913123                | 2.285493  | 0.826656  |
| 27            | 1             | 0           | 0.352775                | -0.422537 | -0.487253 |
| 28            | 1             | 0           | 2.132297                | -1.766330 | -1.128369 |
| 29            | 1             | 0           | 3.058415                | 1.898644  | 0.890419  |
| 30            | 1             | 0           | 5.445601                | 1.361705  | 0.757704  |
| 31            | 1             | 0           | 4.525802                | -2.299407 | -1.259536 |
| 32            | 1             | 0           | 6.644322                | -1.569614 | -0.734242 |

## H ... T' conformer 1

| Center<br>Number | Atomic<br>Number | Atomic<br>Type | Coordinates (Angstroms) |           |           |
|------------------|------------------|----------------|-------------------------|-----------|-----------|
|                  |                  |                | X                       | Y         | Z         |
| 1                | 6                | 0              | -3.187360               | 1.979578  | 0.298380  |
| 2                | 6                | 0              | -1.895797               | 2.332097  | 0.624036  |
| 3                | 6                | 0              | -1.152964               | 1.530449  | 1.488287  |
| 4                | 6                | 0              | -1.729346               | 0.395126  | 2.045799  |
| 5                | 6                | 0              | -3.021016               | 0.045976  | 1.701854  |
| 6                | 6                | 0              | -3.775567               | 0.822181  | 0.820861  |
| 7                | 6                | 0              | -5.125416               | 0.387507  | 0.484958  |
| 8                | 6                | 0              | -5.985814               | 0.988751  | -0.343473 |
| 9                | 8                | 0              | 0.124204                | 1.893533  | 1.742215  |
| 10               | 6                | 0              | -7.328003               | 0.476771  | -0.628849 |
| 11               | 8                | 0              | -8.108371               | 1.021270  | -1.378992 |
| 12               | 8                | 0              | -7.640951               | -0.660561 | 0.010725  |
| 13               | 1                | 0              | -3.738920               | 2.610284  | -0.386837 |
| 14               | 1                | 0              | -1.434263               | 3.211341  | 0.195249  |
| 15               | 1                | 0              | -1.158668               | -0.222254 | 2.728055  |
| 16               | 1                | 0              | -3.454731               | -0.853265 | 2.123007  |
| 17               | 1                | 0              | -5.446951               | -0.529593 | 0.968099  |
| 18               | 1                | 0              | -5.747382               | 1.904607  | -0.867522 |
| 19               | 1                | 0              | 0.624470                | 1.133891  | 2.069430  |
| 20               | 1                | 0              | -8.537920               | -0.903775 | -0.249315 |
| 21               | 6                | 0              | -1.022893               | -2.908314 | 0.029115  |
| 22               | 6                | 0              | -1.396591               | -2.173877 | -1.081476 |
| 23               | 6                | 0              | -0.749793               | -0.978605 | -1.352786 |
| 24               | 6                | 0              | 0.336445                | -0.521448 | -0.559821 |
| 25               | 6                | 0              | 0.612333                | -1.258396 | 0.609001  |
| 26               | 6                | 0              | -0.031428               | -2.446437 | 0.892013  |
| 27               | 8                | 0              | -1.685123               | -4.056359 | 0.263938  |
| 28               | 8                | 0              | -1.179798               | -0.276687 | -2.402841 |
| 29               | 8                | 0              | 1.465346                | -0.725707 | 1.519741  |
| 30               | 6                | 0              | 1.053628                | 0.689369  | -0.988229 |
| 31               | 6                | 0              | 2.467749                | 0.933769  | -0.680711 |
| 32               | 6                | 0              | 3.377438                | -0.035786 | -0.557350 |
| 33               | 6                | 0              | 5.620026                | -1.017822 | -0.340384 |
| 34               | 6                | 0              | 4.817447                | 0.122419  | -0.385939 |
| 35               | 6                | 0              | 5.443099                | 1.367270  | -0.252968 |
| 36               | 6                | 0              | 6.807059                | 1.467237  | -0.084731 |
| 37               | 6                | 0              | 7.590073                | 0.314345  | -0.045174 |
| 38               | 6                | 0              | 6.990906                | -0.933228 | -0.173326 |
| 39               | 8                | 0              | 8.922014                | 0.471894  | 0.120949  |
| 40               | 8                | 0              | 0.485439                | 1.516806  | -1.714368 |
| 41               | 1                | 0              | -2.204171               | -2.506397 | -1.717885 |
| 42               | 1                | 0              | 0.191846                | -2.982104 | 1.807136  |
| 43               | 1                | 0              | -1.358779               | -4.476319 | 1.064396  |
| 44               | 1                | 0              | -0.712857               | 0.591174  | -2.368050 |
| 45               | 1                | 0              | 1.592407                | -1.338381 | 2.249799  |
| 46               | 1                | 0              | 2.746668                | 1.980229  | -0.715077 |
| 47               | 1                | 0              | 3.035442                | -1.065433 | -0.597081 |
| 48               | 1                | 0              | 5.161029                | -1.994505 | -0.439083 |
| 49               | 1                | 0              | 4.856663                | 2.276725  | -0.277671 |
| 50               | 1                | 0              | 7.284558                | 2.432804  | 0.018790  |
| 51               | 1                | 0              | 7.594121                | -1.832892 | -0.141905 |
| 52               | 1                | 0              | 9.360069                | -0.383239 | 0.130987  |

## H ... T' conformer 2

| Center<br>Number | Atomic<br>Number | Atomic<br>Type | Coordinates (Angstroms) |           |           |
|------------------|------------------|----------------|-------------------------|-----------|-----------|
|                  |                  |                | X                       | Y         | Z         |
| 1                | 6                | 0              | 2.790500                | 1.168267  | -1.381114 |
| 2                | 6                | 0              | 3.987944                | 0.489841  | -1.399394 |
| 3                | 6                | 0              | 4.847697                | 0.569570  | -0.305653 |
| 4                | 6                | 0              | 4.504262                | 1.350107  | 0.791290  |
| 5                | 6                | 0              | 3.299582                | 2.028675  | 0.794207  |
| 6                | 6                | 0              | 2.414313                | 1.945008  | -0.279876 |
| 7                | 6                | 0              | 1.123190                | 2.610731  | -0.178422 |
| 8                | 6                | 0              | 0.082937                | 2.463815  | -1.005522 |
| 9                | 8                | 0              | 5.999988                | -0.134344 | -0.367588 |

|    |   |   |           |           |           |
|----|---|---|-----------|-----------|-----------|
| 10 | 6 | 0 | -1.215503 | 3.104576  | -0.797548 |
| 11 | 8 | 0 | -2.165441 | 2.955071  | -1.535433 |
| 12 | 8 | 0 | -1.291956 | 3.873674  | 0.300372  |
| 13 | 1 | 0 | 2.130903  | 1.080042  | -2.234673 |
| 14 | 1 | 0 | 4.267730  | -0.121759 | -2.246917 |
| 15 | 1 | 0 | 5.170444  | 1.414243  | 1.643439  |
| 16 | 1 | 0 | 3.028917  | 2.620778  | 1.660058  |
| 17 | 1 | 0 | 0.998128  | 3.251687  | 0.687821  |
| 18 | 1 | 0 | 0.114360  | 1.811116  | -1.866457 |
| 19 | 1 | 0 | 6.504555  | -0.016729 | 0.441621  |
| 20 | 1 | 0 | -2.185511 | 4.236218  | 0.339864  |
| 21 | 6 | 0 | 2.717219  | -2.782498 | -0.559196 |
| 22 | 6 | 0 | 2.938768  | -2.355184 | 0.736732  |
| 23 | 6 | 0 | 2.068606  | -1.439700 | 1.304959  |
| 24 | 6 | 0 | 0.909432  | -0.976466 | 0.619811  |
| 25 | 6 | 0 | 0.763957  | -1.397399 | -0.721402 |
| 26 | 6 | 0 | 1.641095  | -2.299174 | -1.296752 |
| 27 | 8 | 0 | 3.601962  | -3.651620 | -1.084328 |
| 28 | 8 | 0 | 2.355512  | -1.018142 | 2.537541  |
| 29 | 8 | 0 | -0.217652 | -0.860378 | -1.472003 |
| 30 | 6 | 0 | 0.003266  | -0.064839 | 1.329304  |
| 31 | 6 | 0 | -1.418929 | 0.099759  | 1.003432  |
| 32 | 6 | 0 | -2.210234 | -0.881334 | 0.566521  |
| 33 | 6 | 0 | -4.350280 | -1.978105 | 0.048636  |
| 34 | 6 | 0 | -3.651098 | -0.808475 | 0.346161  |
| 35 | 6 | 0 | -4.374146 | 0.388324  | 0.403454  |
| 36 | 6 | 0 | -5.734617 | 0.412564  | 0.184113  |
| 37 | 6 | 0 | -6.414917 | -0.770238 | -0.101218 |
| 38 | 6 | 0 | -5.716545 | -1.969796 | -0.170480 |
| 39 | 8 | 0 | -7.748998 | -0.688442 | -0.306046 |
| 40 | 8 | 0 | 0.416087  | 0.575621  | 2.309668  |
| 41 | 1 | 0 | 3.802395  | -2.693171 | 1.291268  |
| 42 | 1 | 0 | 1.509421  | -2.595362 | -2.330949 |
| 43 | 1 | 0 | 3.366184  | -3.865458 | -1.991103 |
| 44 | 1 | 0 | 1.733708  | -0.273300 | 2.724536  |
| 45 | 1 | 0 | -0.177612 | -1.217191 | -2.363152 |
| 46 | 1 | 0 | -1.818939 | 1.060597  | 1.306183  |
| 47 | 1 | 0 | -1.763651 | -1.847810 | 0.356207  |
| 48 | 1 | 0 | -3.813177 | -2.917503 | -0.009584 |
| 49 | 1 | 0 | -3.866050 | 1.321485  | 0.610560  |
| 50 | 1 | 0 | -6.287101 | 1.342204  | 0.224935  |
| 51 | 1 | 0 | -6.238980 | -2.891669 | -0.397098 |
| 52 | 1 | 0 | -8.110724 | -1.558107 | -0.496265 |

(H ... H' + T ... T')<sub>h</sub>

| Center<br>Number | Atomic<br>Number | Atomic<br>Type | Coordinates (Angstroms) |           |           |
|------------------|------------------|----------------|-------------------------|-----------|-----------|
|                  |                  |                | X                       | Y         | Z         |
| 1                | 6                | 0              | -0.205661               | 2.118502  | 1.172611  |
| 2                | 6                | 0              | 0.972574                | 2.191352  | 1.882569  |
| 3                | 6                | 0              | 2.190957                | 2.217856  | 1.206995  |
| 4                | 6                | 0              | 2.214321                | 2.189829  | -0.181195 |
| 5                | 6                | 0              | 1.025704                | 2.105212  | -0.880864 |
| 6                | 6                | 0              | -0.205189               | 2.067781  | -0.225422 |
| 7                | 6                | 0              | -1.422973               | 1.957731  | -1.018996 |
| 8                | 6                | 0              | -2.679173               | 2.052936  | -0.574121 |
| 9                | 8                | 0              | 3.318977                | 2.250588  | 1.952200  |
| 10               | 6                | 0              | -3.856448               | 1.912413  | -1.433313 |
| 11               | 8                | 0              | -4.992656               | 2.088452  | -1.051638 |
| 12               | 8                | 0              | -3.584544               | 1.565020  | -2.700928 |
| 13               | 1                | 0              | -1.139128               | 2.067238  | 1.718169  |
| 14               | 1                | 0              | 0.968247                | 2.200205  | 2.964496  |
| 15               | 1                | 0              | 3.159915                | 2.193485  | -0.710501 |
| 16               | 1                | 0              | 1.054041                | 2.055767  | -1.963030 |
| 17               | 1                | 0              | -1.271564               | 1.782636  | -2.079267 |
| 18               | 1                | 0              | -2.915109               | 2.244102  | 0.464152  |
| 19               | 1                | 0              | 4.092137                | 2.187340  | 1.384232  |
| 20               | 1                | 0              | -4.424461               | 1.508118  | -3.172743 |
| 21               | 6                | 0              | -3.810517               | -1.667509 | -0.540992 |
| 22               | 6                | 0              | -3.827466               | -0.830296 | 0.559674  |
| 23               | 6                | 0              | -2.713164               | -0.769518 | 1.379497  |
| 24               | 6                | 0              | -1.532098               | -1.502577 | 1.093277  |

|    |   |   |           |           |           |
|----|---|---|-----------|-----------|-----------|
| 25 | 6 | 0 | -1.593764 | -2.402622 | 0.008907  |
| 26 | 6 | 0 | -2.707507 | -2.472737 | -0.810461 |
| 27 | 8 | 0 | -4.910766 | -1.690923 | -1.318145 |
| 28 | 8 | 0 | -2.787868 | 0.036831  | 2.444832  |
| 29 | 8 | 0 | -0.558763 | -3.244042 | -0.187538 |
| 30 | 6 | 0 | -0.354431 | -1.287373 | 1.952853  |
| 31 | 6 | 0 | 1.028580  | -1.373689 | 1.476712  |
| 32 | 6 | 0 | 1.403788  | -1.156316 | 0.214201  |
| 33 | 6 | 0 | 2.977778  | -0.921921 | -1.656219 |
| 34 | 6 | 0 | 2.768007  | -1.017749 | -0.281119 |
| 35 | 6 | 0 | 3.881269  | -0.915537 | 0.558614  |
| 36 | 6 | 0 | 5.147201  | -0.723351 | 0.047110  |
| 37 | 6 | 0 | 5.334416  | -0.634349 | -1.331198 |
| 38 | 6 | 0 | 4.242091  | -0.737287 | -2.185282 |
| 39 | 8 | 0 | 6.595706  | -0.442572 | -1.778125 |
| 40 | 8 | 0 | -0.518200 | -0.918339 | 3.124887  |
| 41 | 1 | 0 | -4.695743 | -0.227387 | 0.782379  |
| 42 | 1 | 0 | -2.730764 | -3.173500 | -1.636845 |
| 43 | 1 | 0 | -4.793177 | -2.305960 | -2.047142 |
| 44 | 1 | 0 | -1.996431 | -0.156647 | 2.996314  |
| 45 | 1 | 0 | -0.737680 | -3.814146 | -0.939870 |
| 46 | 1 | 0 | 1.753752  | -1.457623 | 2.277624  |
| 47 | 1 | 0 | 0.633357  | -1.031848 | -0.538641 |
| 48 | 1 | 0 | 2.128942  | -0.981282 | -2.327076 |
| 49 | 1 | 0 | 3.758715  | -0.960249 | 1.632908  |
| 50 | 1 | 0 | 6.003722  | -0.635558 | 0.702760  |
| 51 | 1 | 0 | 4.380949  | -0.665121 | -3.257550 |
| 52 | 1 | 0 | 6.605423  | -0.394402 | -2.737751 |

**(H ... H' + T... T')<sub>t</sub>**

| Center<br>Number | Atomic<br>Number | Atomic<br>Type | Coordinates (Angstroms) |           |           |
|------------------|------------------|----------------|-------------------------|-----------|-----------|
|                  |                  |                | X                       | Y         | Z         |
| 1                | 6                | 0              | 3.223608                | -1.016013 | -1.331682 |
| 2                | 6                | 0              | 4.578837                | -0.864178 | -1.142595 |
| 3                | 6                | 0              | 5.201090                | -1.471829 | -0.053537 |
| 4                | 6                | 0              | 4.453982                | -2.238847 | 0.832528  |
| 5                | 6                | 0              | 3.093305                | -2.381078 | 0.630294  |
| 6                | 6                | 0              | 2.449408                | -1.774785 | -0.447586 |
| 7                | 6                | 0              | 1.002909                | -1.901546 | -0.565353 |
| 8                | 6                | 0              | 0.233394                | -1.415611 | -1.543459 |
| 9                | 8                | 0              | 6.529937                | -1.273001 | 0.095069  |
| 10               | 6                | 0              | -1.227784               | -1.507739 | -1.553278 |
| 11               | 8                | 0              | -1.914750               | -1.085346 | -2.456869 |
| 12               | 8                | 0              | -1.761008               | -2.082851 | -0.465228 |
| 13               | 1                | 0              | 2.758991                | -0.512854 | -2.169474 |
| 14               | 1                | 0              | 5.170274                | -0.261214 | -1.818859 |
| 15               | 1                | 0              | 4.933652                | -2.713144 | 1.680499  |
| 16               | 1                | 0              | 2.514126                | -2.967318 | 1.333878  |
| 17               | 1                | 0              | 0.515163                | -2.425531 | 0.250496  |
| 18               | 1                | 0              | 0.640607                | -0.888141 | -2.395538 |
| 19               | 1                | 0              | 6.852376                | -1.742265 | 0.869195  |
| 20               | 1                | 0              | -2.725934               | -2.026030 | -0.542103 |
| 21               | 6                | 0              | -4.722591               | -1.247326 | 1.352370  |
| 22               | 6                | 0              | -4.994057               | -0.997509 | 0.015806  |
| 23               | 6                | 0              | -4.408023               | 0.100171  | -0.601411 |
| 24               | 6                | 0              | -3.438171               | 0.893470  | 0.066010  |
| 25               | 6                | 0              | -3.258092               | 0.649255  | 1.442215  |
| 26               | 6                | 0              | -3.880015               | -0.411830 | 2.079095  |
| 27               | 8                | 0              | -5.333581               | -2.304924 | 1.917154  |
| 28               | 8                | 0              | -4.778336               | 0.361679  | -1.853780 |
| 29               | 8                | 0              | -2.499598               | 1.509169  | 2.149239  |
| 30               | 6                | 0              | -2.688750               | 1.881557  | -0.732743 |
| 31               | 6                | 0              | -1.282335               | 2.218053  | -0.488964 |
| 32               | 6                | 0              | -0.411562               | 1.437429  | 0.157810  |
| 33               | 6                | 0              | 1.715833                | 0.948796  | 1.282914  |
| 34               | 6                | 0              | 1.022205                | 1.659016  | 0.303081  |
| 35               | 6                | 0              | 1.747556                | 2.543126  | -0.501583 |
| 36               | 6                | 0              | 3.105722                | 2.710816  | -0.332151 |
| 37               | 6                | 0              | 3.775578                | 1.996423  | 0.658719  |
| 38               | 6                | 0              | 3.073178                | 1.119847  | 1.475671  |
| 39               | 8                | 0              | 5.110595                | 2.182622  | 0.768388  |

|    |   |   |           |           |           |
|----|---|---|-----------|-----------|-----------|
| 40 | 8 | 0 | -3.223487 | 2.388205  | -1.728617 |
| 41 | 1 | 0 | -5.704270 | -1.605696 | -0.526165 |
| 42 | 1 | 0 | -3.727308 | -0.573191 | 3.139716  |
| 43 | 1 | 0 | -5.080090 | -2.387461 | 2.840531  |
| 44 | 1 | 0 | -4.337380 | 1.203430  | -2.109057 |
| 45 | 1 | 0 | -2.460098 | 1.234150  | 3.069067  |
| 46 | 1 | 0 | -0.959876 | 3.116757  | -1.002505 |
| 47 | 1 | 0 | -0.779332 | 0.537981  | 0.638505  |
| 48 | 1 | 0 | 1.180032  | 0.241072  | 1.904479  |
| 49 | 1 | 0 | 1.248842  | 3.091457  | -1.290704 |
| 50 | 1 | 0 | 3.666817  | 3.380140  | -0.971075 |
| 51 | 1 | 0 | 3.592910  | 0.549950  | 2.236291  |
| 52 | 1 | 0 | 5.470967  | 1.605485  | 1.446957  |

## T ... H'

| Center<br>Number | Atomic<br>Number | Atomic<br>Type | Coordinates (Angstroms) |           |           |
|------------------|------------------|----------------|-------------------------|-----------|-----------|
|                  |                  |                | X                       | Y         | Z         |
| 1                | 6                | 0              | -5.016057               | 1.190238  | 0.120395  |
| 2                | 6                | 0              | -6.287863               | 0.661148  | 0.075218  |
| 3                | 6                | 0              | -6.617785               | -0.426373 | 0.881485  |
| 4                | 6                | 0              | -5.665205               | -0.964785 | 1.740329  |
| 5                | 6                | 0              | -4.396304               | -0.414554 | 1.782703  |
| 6                | 6                | 0              | -4.039811               | 0.661304  | 0.970353  |
| 7                | 6                | 0              | -2.665744               | 1.149943  | 1.012180  |
| 8                | 6                | 0              | -2.104744               | 2.019586  | 0.168372  |
| 9                | 8                | 0              | -7.875285               | -0.912085 | 0.790469  |
| 10               | 6                | 0              | -0.698525               | 2.423303  | 0.229438  |
| 11               | 8                | 0              | -0.175709               | 3.150161  | -0.586985 |
| 12               | 8                | 0              | -0.014730               | 1.922805  | 1.268884  |
| 13               | 1                | 0              | -4.783198               | 2.032808  | -0.517797 |
| 14               | 1                | 0              | -7.039134               | 1.076630  | -0.583439 |
| 15               | 1                | 0              | -5.918337               | -1.804536 | 2.376675  |
| 16               | 1                | 0              | -3.659286               | -0.840431 | 2.453110  |
| 17               | 1                | 0              | -2.044732               | 0.726359  | 1.794313  |
| 18               | 1                | 0              | -2.646709               | 2.456574  | -0.659492 |
| 19               | 1                | 0              | -7.991228               | -1.652847 | 1.391498  |
| 20               | 1                | 0              | 0.901367                | 2.213390  | 1.178544  |
| 21               | 6                | 0              | 6.043221                | -1.304098 | 1.308533  |
| 22               | 6                | 0              | 5.997865                | 0.073078  | 1.445542  |
| 23               | 6                | 0              | 5.172893                | 0.807366  | 0.609340  |
| 24               | 6                | 0              | 4.316743                | 0.179931  | -0.332163 |
| 25               | 6                | 0              | 4.445633                | -1.216098 | -0.479068 |
| 26               | 6                | 0              | 5.288860                | -1.953087 | 0.335378  |
| 27               | 8                | 0              | 6.868246                | -1.979662 | 2.131648  |
| 28               | 8                | 0              | 5.197664                | 2.138452  | 0.741607  |
| 29               | 8                | 0              | 3.764869                | -1.821995 | -1.472197 |
| 30               | 6                | 0              | 3.374745                | 1.024765  | -1.088028 |
| 31               | 6                | 0              | 2.040056                | 0.569209  | -1.486386 |
| 32               | 6                | 0              | 1.338160                | -0.337586 | -0.800597 |
| 33               | 6                | 0              | -0.662292               | -1.570435 | -0.092896 |
| 34               | 6                | 0              | -0.048146               | -0.728182 | -1.020212 |
| 35               | 6                | 0              | -0.808277               | -0.290263 | -2.109690 |
| 36               | 6                | 0              | -2.126699               | -0.664805 | -2.257319 |
| 37               | 6                | 0              | -2.724950               | -1.490213 | -1.308356 |
| 38               | 6                | 0              | -1.983599               | -1.951913 | -0.227140 |
| 39               | 8                | 0              | -4.025129               | -1.810931 | -1.487682 |
| 40               | 8                | 0              | 3.665452                | 2.205785  | -1.321967 |
| 41               | 1                | 0              | 6.619546                | 0.577254  | 2.171622  |
| 42               | 1                | 0              | 5.375991                | -3.024530 | 0.198779  |
| 43               | 1                | 0              | 6.836060                | -2.921222 | 1.941649  |
| 44               | 1                | 0              | 4.695356                | 2.506636  | -0.017930 |
| 45               | 1                | 0              | 3.952067                | -2.764413 | -1.471235 |
| 46               | 1                | 0              | 1.593770                | 1.153877  | -2.281640 |
| 47               | 1                | 0              | 1.820559                | -0.829865 | 0.037993  |
| 48               | 1                | 0              | -0.094261               | -1.926400 | 0.758453  |
| 49               | 1                | 0              | -0.366933               | 0.359336  | -2.854516 |
| 50               | 1                | 0              | -2.713049               | -0.314483 | -3.096595 |
| 51               | 1                | 0              | -2.444367               | -2.597832 | 0.510531  |
| 52               | 1                | 0              | -4.369547               | -2.251423 | -0.705214 |

$(\text{H} \cdots \text{T} + \text{T} \cdots \text{H})_t$ 

| Center<br>Number | Atomic<br>Number | Atomic<br>Type | Coordinates (Angstroms) |           |           |
|------------------|------------------|----------------|-------------------------|-----------|-----------|
|                  |                  |                | X                       | Y         | Z         |
| 1                | 6                | 0              | -0.779818               | 1.911962  | 1.417574  |
| 2                | 6                | 0              | 0.555366                | 2.175839  | 1.631593  |
| 3                | 6                | 0              | 1.375779                | 2.536974  | 0.562887  |
| 4                | 6                | 0              | 0.840045                | 2.624831  | -0.716806 |
| 5                | 6                | 0              | -0.499966               | 2.348332  | -0.918036 |
| 6                | 6                | 0              | -1.338997               | 1.994566  | 0.137661  |
| 7                | 6                | 0              | -2.742318               | 1.711313  | -0.137368 |
| 8                | 6                | 0              | -3.689119               | 1.428045  | 0.761775  |
| 9                | 8                | 0              | 2.672924                | 2.803405  | 0.827519  |
| 10               | 6                | 0              | -5.079871               | 1.131057  | 0.419485  |
| 11               | 8                | 0              | -5.927488               | 0.856162  | 1.241718  |
| 12               | 8                | 0              | -5.361165               | 1.186526  | -0.890683 |
| 13               | 1                | 0              | -1.392148               | 1.623047  | 2.261990  |
| 14               | 1                | 0              | 0.984925                | 2.100939  | 2.622077  |
| 15               | 1                | 0              | 1.469938                | 2.906447  | -1.550913 |
| 16               | 1                | 0              | -0.905108               | 2.407320  | -1.921241 |
| 17               | 1                | 0              | -3.025450               | 1.734491  | -1.184614 |
| 18               | 1                | 0              | -3.486110               | 1.383751  | 1.823116  |
| 19               | 1                | 0              | 3.196440                | 2.725881  | 0.016640  |
| 20               | 1                | 0              | -6.293589               | 0.961972  | -0.997349 |
| 21               | 6                | 0              | 5.021159                | -0.925630 | 1.225964  |
| 22               | 6                | 0              | 4.982428                | 0.222515  | 0.449834  |
| 23               | 6                | 0              | 4.035472                | 0.321320  | -0.550510 |
| 24               | 6                | 0              | 3.063207                | -0.682701 | -0.770870 |
| 25               | 6                | 0              | 3.179432                | -1.856361 | 0.000036  |
| 26               | 6                | 0              | 4.136997                | -1.973713 | 0.994557  |
| 27               | 8                | 0              | 5.964018                | -0.989302 | 2.184428  |
| 28               | 8                | 0              | 4.044865                | 1.445533  | -1.296352 |
| 29               | 8                | 0              | 2.367424                | -2.893137 | -0.282140 |
| 30               | 6                | 0              | 2.032705                | -0.444505 | -1.799617 |
| 31               | 6                | 0              | 0.661527                | -0.938102 | -1.681408 |
| 32               | 6                | 0              | 0.046362                | -1.123444 | -0.509823 |
| 33               | 6                | 0              | -1.822983               | -1.608526 | 1.007118  |
| 34               | 6                | 0              | -1.356452               | -1.452871 | -0.297627 |
| 35               | 6                | 0              | -2.271568               | -1.615394 | -1.343397 |
| 36               | 6                | 0              | -3.590266               | -1.926724 | -1.096545 |
| 37               | 6                | 0              | -4.034711               | -2.078903 | 0.214944  |
| 38               | 6                | 0              | -3.144994               | -1.917081 | 1.270850  |
| 39               | 8                | 0              | -5.339547               | -2.378866 | 0.397293  |
| 40               | 8                | 0              | 2.303032                | 0.275548  | -2.770828 |
| 41               | 1                | 0              | 5.692272                | 1.021776  | 0.607689  |
| 42               | 1                | 0              | 4.206699                | -2.887589 | 1.573038  |
| 43               | 1                | 0              | 5.919045                | -1.830526 | 2.647140  |
| 44               | 1                | 0              | 3.469605                | 1.263521  | -2.075082 |
| 45               | 1                | 0              | 2.566225                | -3.633265 | 0.297280  |
| 46               | 1                | 0              | 0.125781                | -0.978379 | -2.622281 |
| 47               | 1                | 0              | 0.626612                | -0.996162 | 0.398715  |
| 48               | 1                | 0              | -1.136190               | -1.476331 | 1.834794  |
| 49               | 1                | 0              | -1.952530               | -1.493889 | -2.370392 |
| 50               | 1                | 0              | -4.295021               | -2.045566 | -1.908880 |
| 51               | 1                | 0              | -3.488291               | -2.027539 | 2.292717  |
| 52               | 1                | 0              | -5.552095               | -2.383634 | 1.334282  |

 $\text{O}^{\text{A}} \cdots \text{H}^{\text{a}}$ 

| Center<br>Number | Atomic<br>Number | Atomic<br>Type | Coordinates (Angstroms) |           |           |
|------------------|------------------|----------------|-------------------------|-----------|-----------|
|                  |                  |                | X                       | Y         | Z         |
| 1                | 6                | 0              | 6.194833                | -0.848828 | 1.211507  |
| 2                | 6                | 0              | 5.929613                | 0.509800  | 1.236888  |
| 3                | 6                | 0              | 4.919370                | 1.015739  | 0.436931  |
| 4                | 6                | 0              | 4.104204                | 0.165483  | -0.363168 |
| 5                | 6                | 0              | 4.451240                | -1.206192 | -0.396663 |
| 6                | 6                | 0              | 5.474811                | -1.708930 | 0.384792  |
| 7                | 8                | 0              | 7.191046                | -1.295749 | 1.995539  |
| 8                | 8                | 0              | 4.724688                | 2.334647  | 0.464789  |
| 9                | 8                | 0              | 3.793942                | -2.012011 | -1.248909 |

|    |   |   |           |           |           |
|----|---|---|-----------|-----------|-----------|
| 10 | 6 | 0 | 2.973495  | 0.745959  | -1.076155 |
| 11 | 6 | 0 | 1.756653  | 0.004018  | -1.418818 |
| 12 | 6 | 0 | 1.154882  | -0.807272 | -0.546548 |
| 13 | 6 | 0 | -0.814485 | -1.811990 | 0.521442  |
| 14 | 6 | 0 | -0.217045 | -1.295006 | -0.627657 |
| 15 | 6 | 0 | -0.999467 | -1.188530 | -1.781619 |
| 16 | 6 | 0 | -2.327484 | -1.557306 | -1.780339 |
| 17 | 6 | 0 | -2.913191 | -2.038879 | -0.611959 |
| 18 | 6 | 0 | -2.147547 | -2.178933 | 0.539016  |
| 19 | 8 | 0 | -4.225729 | -2.357189 | -0.656161 |
| 20 | 8 | 0 | 2.957338  | 1.969141  | -1.331247 |
| 21 | 1 | 0 | 6.516147  | 1.175898  | 1.853188  |
| 22 | 1 | 0 | 5.728637  | -2.761495 | 0.336983  |
| 23 | 1 | 0 | 7.298933  | -2.245586 | 1.895691  |
| 24 | 1 | 0 | 4.055431  | 2.539519  | -0.226645 |
| 25 | 1 | 0 | 4.136971  | -2.907469 | -1.185525 |
| 26 | 1 | 0 | 1.240920  | 0.375274  | -2.295540 |
| 27 | 1 | 0 | 1.686218  | -1.066812 | 0.364422  |
| 28 | 1 | 0 | -0.228780 | -1.906404 | 1.428190  |
| 29 | 1 | 0 | -0.568763 | -0.802701 | -2.696832 |
| 30 | 1 | 0 | -2.931814 | -1.462347 | -2.672985 |
| 31 | 1 | 0 | -2.598556 | -2.559586 | 1.447736  |
| 32 | 1 | 0 | -4.554510 | -2.530189 | 0.230466  |
| 33 | 6 | 0 | -4.681991 | 1.273983  | -0.371335 |
| 34 | 6 | 0 | -5.986932 | 0.830942  | -0.356296 |
| 35 | 6 | 0 | -6.461397 | 0.102226  | 0.732428  |
| 36 | 6 | 0 | -5.618049 | -0.166797 | 1.804796  |
| 37 | 6 | 0 | -4.312482 | 0.290680  | 1.777363  |
| 38 | 6 | 0 | -3.814168 | 1.012973  | 0.693802  |
| 39 | 6 | 0 | -2.415490 | 1.424360  | 0.706677  |
| 40 | 6 | 0 | -1.738008 | 2.029451  | -0.270975 |
| 41 | 8 | 0 | -7.745795 | -0.317273 | 0.690694  |
| 42 | 6 | 0 | -0.296884 | 2.289666  | -0.130750 |
| 43 | 8 | 0 | 0.355414  | 2.125199  | 0.877462  |
| 44 | 8 | 0 | 0.243025  | 2.715533  | -1.276595 |
| 45 | 1 | 0 | -4.334797 | 1.832005  | -1.231375 |
| 46 | 1 | 0 | -6.652625 | 1.035546  | -1.184514 |
| 47 | 1 | 0 | -5.982606 | -0.727872 | 2.657208  |
| 48 | 1 | 0 | -3.659684 | 0.072114  | 2.614052  |
| 49 | 1 | 0 | -1.862246 | 1.177825  | 1.608293  |
| 50 | 1 | 0 | -2.185028 | 2.287651  | -1.221660 |
| 51 | 1 | 0 | -7.962902 | -0.807562 | 1.488122  |
| 52 | 1 | 0 | 1.220727  | 2.664107  | -1.214002 |

OA ... H<sup>b</sup> + T ... T'

| Center<br>Number | Atomic<br>Number | Atomic<br>Type | Coordinates (Angstroms) |           |           |
|------------------|------------------|----------------|-------------------------|-----------|-----------|
|                  |                  |                | X                       | Y         | Z         |
| 1                | 6                | 0              | 5.912085                | 1.428909  | -0.880159 |
| 2                | 6                | 0              | 5.657791                | 0.193456  | -1.451891 |
| 3                | 6                | 0              | 4.648654                | -0.597761 | -0.930707 |
| 4                | 6                | 0              | 3.819977                | -0.144255 | 0.133313  |
| 5                | 6                | 0              | 4.156556                | 1.097786  | 0.720179  |
| 6                | 6                | 0              | 5.181023                | 1.878174  | 0.217264  |
| 7                | 8                | 0              | 6.909146                | 2.158328  | -1.410141 |
| 8                | 8                | 0              | 4.467901                | -1.796878 | -1.489393 |
| 9                | 8                | 0              | 3.488992                | 1.486791  | 1.820995  |
| 10               | 6                | 0              | 2.689438                | -0.970692 | 0.545771  |
| 11               | 6                | 0              | 1.446237                | -0.430929 | 1.094140  |
| 12               | 6                | 0              | 0.892910                | 0.701664  | 0.649954  |
| 13               | 6                | 0              | -0.932468               | 2.281828  | 0.208679  |
| 14               | 6                | 0              | -0.465926               | 1.161487  | 0.897268  |
| 15               | 6                | 0              | -1.356200               | 0.500665  | 1.751328  |
| 16               | 6                | 0              | -2.652314               | 0.937471  | 1.906900  |
| 17               | 6                | 0              | -3.100934               | 2.051019  | 1.199056  |
| 18               | 6                | 0              | -2.234182               | 2.727722  | 0.349759  |
| 19               | 8                | 0              | -4.389982               | 2.419074  | 1.367622  |
| 20               | 8                | 0              | 2.716284                | -2.202093 | 0.333127  |
| 21               | 1                | 0              | 6.254443                | -0.166114 | -2.277878 |
| 22               | 1                | 0              | 5.426436                | 2.821793  | 0.690376  |
| 23               | 1                | 0              | 7.011314                | 2.987531  | -0.934847 |
| 24               | 1                | 0              | 3.818992                | -2.279334 | -0.933555 |

|    |   |   |           |           |           |
|----|---|---|-----------|-----------|-----------|
| 25 | 1 | 0 | 3.827792  | 2.331530  | 2.129235  |
| 26 | 1 | 0 | 0.890707  | -1.129649 | 1.707178  |
| 27 | 1 | 0 | 1.475178  | 1.327353  | -0.019817 |
| 28 | 1 | 0 | -0.264431 | 2.809459  | -0.461804 |
| 29 | 1 | 0 | -1.040755 | -0.382524 | 2.291586  |
| 30 | 1 | 0 | -3.340552 | 0.412887  | 2.556393  |
| 31 | 1 | 0 | -2.579844 | 3.591882  | -0.204983 |
| 32 | 1 | 0 | -4.597200 | 3.171196  | 0.806239  |
| 33 | 6 | 0 | -1.774651 | -1.480522 | -1.076345 |
| 34 | 6 | 0 | -0.625304 | -2.150155 | -0.716090 |
| 35 | 6 | 0 | -0.659307 | -3.099015 | 0.308074  |
| 36 | 6 | 0 | -1.875348 | -3.414930 | 0.907318  |
| 37 | 6 | 0 | -3.024848 | -2.753457 | 0.519506  |
| 38 | 6 | 0 | -2.995750 | -1.753007 | -0.454083 |
| 39 | 6 | 0 | -4.210379 | -1.001686 | -0.732896 |
| 40 | 6 | 0 | -4.294254 | 0.170266  | -1.368746 |
| 41 | 8 | 0 | 0.449239  | -3.727864 | 0.741587  |
| 42 | 6 | 0 | -5.582758 | 0.853226  | -1.509508 |
| 43 | 8 | 0 | -6.666207 | 0.424701  | -1.181467 |
| 44 | 8 | 0 | -5.439567 | 2.073363  | -2.056394 |
| 45 | 1 | 0 | -1.718081 | -0.732045 | -1.856490 |
| 46 | 1 | 0 | 0.312873  | -1.928779 | -1.208133 |
| 47 | 1 | 0 | -1.901010 | -4.164700 | 1.687356  |
| 48 | 1 | 0 | -3.963510 | -2.993858 | 1.004948  |
| 49 | 1 | 0 | -5.132295 | -1.420176 | -0.338666 |
| 50 | 1 | 0 | -3.424258 | 0.690339  | -1.746535 |
| 51 | 1 | 0 | 1.253584  | -3.227661 | 0.490960  |
| 52 | 1 | 0 | -6.316143 | 2.473910  | -2.117551 |

OC ... H<sup>a</sup> + T ... T'

| Center<br>Number | Atomic<br>Number | Atomic<br>Type | Coordinates (Angstroms) |           |           |
|------------------|------------------|----------------|-------------------------|-----------|-----------|
|                  |                  |                | X                       | Y         | Z         |
| 1                | 6                | 0              | 5.300569                | 1.071554  | -1.309765 |
| 2                | 6                | 0              | 5.129374                | -0.281788 | -1.056698 |
| 3                | 6                | 0              | 4.238598                | -0.669199 | -0.074673 |
| 4                | 6                | 0              | 3.448762                | 0.263329  | 0.630805  |
| 5                | 6                | 0              | 3.691952                | 1.624020  | 0.382040  |
| 6                | 6                | 0              | 4.603678                | 2.028562  | -0.581162 |
| 7                | 8                | 0              | 6.186725                | 1.411415  | -2.265903 |
| 8                | 8                | 0              | 4.112007                | -1.995987 | 0.155598  |
| 9                | 8                | 0              | 3.044324                | 2.533741  | 1.137532  |
| 10               | 6                | 0              | 2.436060                | -0.257202 | 1.577804  |
| 11               | 6                | 0              | 1.091056                | 0.305226  | 1.674897  |
| 12               | 6                | 0              | 0.515947                | 1.005783  | 0.691436  |
| 13               | 6                | 0              | -1.237540               | 2.323800  | -0.407710 |
| 14               | 6                | 0              | -0.864567               | 1.460820  | 0.623348  |
| 15               | 6                | 0              | -1.849118               | 1.067329  | 1.536710  |
| 16               | 6                | 0              | -3.143691               | 1.523374  | 1.430567  |
| 17               | 6                | 0              | -3.491214               | 2.393323  | 0.399158  |
| 18               | 6                | 0              | -2.531601               | 2.796029  | -0.522064 |
| 19               | 8                | 0              | -4.777867               | 2.800229  | 0.335906  |
| 20               | 8                | 0              | 2.695828                | -1.271315 | 2.233546  |
| 21               | 1                | 0              | 5.700228                | -1.022677 | -1.597866 |
| 22               | 1                | 0              | 4.781857                | 3.084033  | -0.750890 |
| 23               | 1                | 0              | 6.237752                | 2.367174  | -2.352299 |
| 24               | 1                | 0              | 3.672439                | -2.093538 | 1.026187  |
| 25               | 1                | 0              | 3.299622                | 3.422216  | 0.876046  |
| 26               | 1                | 0              | 0.536613                | -0.019034 | 2.547594  |
| 27               | 1                | 0              | 1.121507                | 1.263324  | -0.171623 |
| 28               | 1                | 0              | -0.496451               | 2.633140  | -1.135294 |
| 29               | 1                | 0              | -1.606306               | 0.374829  | 2.332274  |
| 30               | 1                | 0              | -3.905878               | 1.200696  | 2.127258  |
| 31               | 1                | 0              | -2.800396               | 3.463579  | -1.332246 |
| 32               | 1                | 0              | -4.906598               | 3.382726  | -0.417301 |
| 33               | 6                | 0              | -3.586886               | -1.989588 | 0.215355  |
| 34               | 6                | 0              | -4.912118               | -1.613808 | 0.220814  |
| 35               | 6                | 0              | -5.372298               | -0.677034 | -0.703054 |
| 36               | 6                | 0              | -4.494499               | -0.129781 | -1.629783 |
| 37               | 6                | 0              | -3.165246               | -0.509686 | -1.617158 |
| 38               | 6                | 0              | -2.682829               | -1.444715 | -0.702709 |
| 39               | 6                | 0              | -1.267053               | -1.790676 | -0.730130 |



|    |   |   |           |           |           |
|----|---|---|-----------|-----------|-----------|
| 40 | 6 | 0 | -0.657009 | -2.740021 | -0.014056 |
| 41 | 8 | 0 | -6.678916 | -0.334609 | -0.645363 |
| 42 | 6 | 0 | 0.781370  | -3.009986 | -0.079926 |
| 43 | 8 | 0 | 1.332228  | -3.852734 | 0.596205  |
| 44 | 8 | 0 | 1.457956  | -2.250257 | -0.950654 |
| 45 | 1 | 0 | -3.249440 | -2.707686 | 0.951575  |
| 46 | 1 | 0 | -5.604908 | -2.029181 | 0.940916  |
| 47 | 1 | 0 | -4.846196 | 0.605751  | -2.343697 |
| 48 | 1 | 0 | -2.482216 | -0.062184 | -2.328889 |
| 49 | 1 | 0 | -0.659580 | -1.200574 | -1.408736 |
| 50 | 1 | 0 | -1.189267 | -3.376347 | 0.680461  |
| 51 | 1 | 0 | -6.876245 | 0.331599  | -1.308962 |
| 52 | 1 | 0 | 2.404998  | -2.439709 | -0.833716 |

## H<sup>1</sup> ... O<sup>α</sup> + O<sup>A</sup> ... H<sup>a</sup>

| Center<br>Number | Atomic<br>Number | Atomic<br>Type | Coordinates (Angstroms) |           |           |
|------------------|------------------|----------------|-------------------------|-----------|-----------|
|                  |                  |                | X                       | Y         | Z         |
| 1                | 6                | 0              | 5.703687                | 2.210205  | 0.884076  |
| 2                | 6                | 0              | 4.481865                | 2.771519  | 1.215660  |
| 3                | 6                | 0              | 3.331021                | 2.345256  | 0.565726  |
| 4                | 6                | 0              | 3.392708                | 1.340170  | -0.415300 |
| 5                | 6                | 0              | 4.642787                | 0.792985  | -0.722863 |
| 6                | 6                | 0              | 5.798155                | 1.218460  | -0.086311 |
| 7                | 8                | 0              | 6.791709                | 2.666080  | 1.542972  |
| 8                | 8                | 0              | 2.186118                | 2.927061  | 0.953426  |
| 9                | 8                | 0              | 4.685527                | -0.141497 | -1.699589 |
| 10               | 6                | 0              | 2.163056                | 0.947008  | -1.153029 |
| 11               | 6                | 0              | 1.657787                | -0.414626 | -1.106160 |
| 12               | 6                | 0              | 2.109195                | -1.326656 | -0.232270 |
| 13               | 6                | 0              | 2.235517                | -3.487132 | 0.920508  |
| 14               | 6                | 0              | 1.630231                | -2.685365 | -0.049560 |
| 15               | 6                | 0              | 0.584644                | -3.238705 | -0.800011 |
| 16               | 6                | 0              | 0.164941                | -4.532778 | -0.590472 |
| 17               | 6                | 0              | 0.784686                | -5.316042 | 0.383824  |
| 18               | 6                | 0              | 1.825150                | -4.788169 | 1.141205  |
| 19               | 8                | 0              | 0.331838                | -6.575864 | 0.546548  |
| 20               | 8                | 0              | 1.535617                | 1.819896  | -1.759692 |
| 21               | 1                | 0              | 4.416666                | 3.530648  | 1.982336  |
| 22               | 1                | 0              | 6.758645                | 0.794045  | -0.354555 |
| 23               | 1                | 0              | 7.580343                | 2.208866  | 1.239776  |
| 24               | 1                | 0              | 1.376782                | 2.523559  | 0.585263  |
| 25               | 1                | 0              | 5.589607                | -0.435935 | -1.835191 |
| 26               | 1                | 0              | 0.837356                | -0.623617 | -1.782417 |
| 27               | 1                | 0              | 2.918973                | -1.030826 | 0.428375  |
| 28               | 1                | 0              | 3.045577                | -3.081191 | 1.514535  |
| 29               | 1                | 0              | 0.087538                | -2.649476 | -1.559486 |
| 30               | 1                | 0              | -0.643801               | -4.956376 | -1.171132 |
| 31               | 1                | 0              | 2.308448                | -5.393459 | 1.898741  |
| 32               | 1                | 0              | 0.823326                | -7.021625 | 1.241866  |
| 33               | 6                | 0              | -5.537612               | 1.086421  | 1.163469  |
| 34               | 6                | 0              | -6.867130               | 0.868516  | 1.451220  |
| 35               | 6                | 0              | -7.763304               | 0.578232  | 0.422951  |
| 36               | 6                | 0              | -7.311931               | 0.509840  | -0.890042 |
| 37               | 6                | 0              | -5.974235               | 0.730116  | -1.163589 |
| 38               | 6                | 0              | -5.059834               | 1.022115  | -0.150782 |
| 39               | 6                | 0              | -3.663746               | 1.242585  | -0.507786 |
| 40               | 6                | 0              | -2.653996               | 1.536790  | 0.317326  |
| 41               | 8                | 0              | -9.054408               | 0.373209  | 0.762087  |
| 42               | 6                | 0              | -1.275662               | 1.733956  | -0.140464 |
| 43               | 8                | 0              | -0.369520               | 1.984014  | 0.641602  |
| 44               | 8                | 0              | -1.086889               | 1.620070  | -1.443475 |
| 45               | 1                | 0              | -4.861968               | 1.309768  | 1.979010  |
| 46               | 1                | 0              | -7.230845               | 0.918953  | 2.469113  |
| 47               | 1                | 0              | -8.004422               | 0.286099  | -1.692738 |
| 48               | 1                | 0              | -5.630359               | 0.674454  | -2.189627 |
| 49               | 1                | 0              | -3.437564               | 1.153126  | -1.565531 |
| 50               | 1                | 0              | -2.784120               | 1.645517  | 1.385743  |
| 51               | 1                | 0              | -9.578497               | 0.182409  | -0.020511 |
| 52               | 1                | 0              | -0.119499               | 1.713089  | -1.648564 |

## H<sup>2</sup> ... O<sup>α</sup>

| Center Number | Atomic Number | Atomic Type | Coordinates (Angstroms) |           |           |
|---------------|---------------|-------------|-------------------------|-----------|-----------|
|               |               |             | X                       | Y         | Z         |
| 1             | 6             | 0           | 3.276014                | -1.761674 | -0.492631 |
| 2             | 6             | 0           | 2.914815                | -3.076434 | -0.751609 |
| 3             | 6             | 0           | 1.698216                | -3.549412 | -0.290544 |
| 4             | 6             | 0           | 0.760099                | -2.698670 | 0.357698  |
| 5             | 6             | 0           | 1.189049                | -1.384046 | 0.643479  |
| 6             | 6             | 0           | 2.431935                | -0.931258 | 0.243055  |
| 7             | 8             | 0           | 4.464654                | -1.343069 | -0.943550 |
| 8             | 8             | 0           | 1.420817                | -4.839109 | -0.507659 |
| 9             | 8             | 0           | 0.386107                | -0.587283 | 1.376207  |
| 10            | 6             | 0           | -0.553747               | -3.244366 | 0.709420  |
| 11            | 6             | 0           | -1.771833               | -2.418687 | 0.781668  |
| 12            | 6             | 0           | -2.045037               | -1.443498 | -0.084571 |
| 13            | 6             | 0           | -3.671963               | -0.089094 | -1.358226 |
| 14            | 6             | 0           | -3.299976               | -0.694900 | -0.159499 |
| 15            | 6             | 0           | -4.152080               | -0.547102 | 0.938669  |
| 16            | 6             | 0           | -5.329103               | 0.165732  | 0.842966  |
| 17            | 6             | 0           | -5.688862               | 0.756604  | -0.366123 |
| 18            | 6             | 0           | -4.850467               | 0.631900  | -1.470674 |
| 19            | 8             | 0           | -6.851611               | 1.442736  | -0.405019 |
| 20            | 8             | 0           | -0.697215               | -4.462624 | 0.881674  |
| 21            | 1             | 0           | 3.586376                | -3.738893 | -1.279235 |
| 22            | 1             | 0           | 2.764331                | 0.054476  | 0.534163  |
| 23            | 1             | 0           | 4.620711                | -0.395098 | -0.770188 |
| 24            | 1             | 0           | 0.600350                | -5.039755 | -0.004017 |
| 25            | 1             | 0           | 0.747940                | 0.304733  | 1.410419  |
| 26            | 1             | 0           | -2.517395               | -2.780834 | 1.480493  |
| 27            | 1             | 0           | -1.295503               | -1.180649 | -0.825984 |
| 28            | 1             | 0           | -3.032915               | -0.190313 | -2.227242 |
| 29            | 1             | 0           | -3.879757               | -0.979663 | 1.893017  |
| 30            | 1             | 0           | -5.977775               | 0.283493  | 1.700932  |
| 31            | 1             | 0           | -5.122429               | 1.087169  | -2.415681 |
| 32            | 1             | 0           | -7.000598               | 1.801459  | -1.283949 |
| 33            | 6             | 0           | 0.724553                | 3.011603  | 0.946716  |
| 34            | 6             | 0           | -0.637920               | 3.101941  | 1.134546  |
| 35            | 6             | 0           | -1.509428               | 2.645152  | 0.145453  |
| 36            | 6             | 0           | -0.998292               | 2.108402  | -1.032223 |
| 37            | 6             | 0           | 0.368032                | 2.007849  | -1.201610 |
| 38            | 6             | 0           | 1.257610                | 2.457688  | -0.224110 |
| 39            | 6             | 0           | 2.682743                | 2.258299  | -0.432997 |
| 40            | 6             | 0           | 3.693692                | 2.674955  | 0.335964  |
| 41            | 8             | 0           | -2.830407               | 2.749944  | 0.383979  |
| 42            | 6             | 0           | 5.055067                | 2.223649  | 0.046012  |
| 43            | 8             | 0           | 5.349763                | 1.276506  | -0.661682 |
| 44            | 8             | 0           | 5.983618                | 2.948857  | 0.665202  |
| 45            | 1             | 0           | 1.382508                | 3.359557  | 1.732725  |
| 46            | 1             | 0           | -1.046520               | 3.515048  | 2.047130  |
| 47            | 1             | 0           | -1.669538               | 1.766862  | -1.808705 |
| 48            | 1             | 0           | 0.756792                | 1.568100  | -2.112108 |
| 49            | 1             | 0           | 2.940559                | 1.655737  | -1.299305 |
| 50            | 1             | 0           | 3.562626                | 3.324331  | 1.190837  |
| 51            | 1             | 0           | -3.335720               | 2.290603  | -0.298113 |
| 52            | 1             | 0           | 6.851457                | 2.578181  | 0.456621  |

## H<sup>3</sup> ... O<sup>α</sup> + H<sup>4</sup> ... O<sup>γ</sup>

| Center Number | Atomic Number | Atomic Type | Coordinates (Angstroms) |           |           |
|---------------|---------------|-------------|-------------------------|-----------|-----------|
|               |               |             | X                       | Y         | Z         |
| 1             | 6             | 0           | 4.707740                | -0.783375 | 1.578348  |
| 2             | 6             | 0           | 5.273382                | 0.468306  | 1.394482  |
| 3             | 6             | 0           | 4.692088                | 1.342448  | 0.491557  |
| 4             | 6             | 0           | 3.490668                | 1.019673  | -0.191823 |
| 5             | 6             | 0           | 2.985720                | -0.289307 | -0.020867 |
| 6             | 6             | 0           | 3.581654                | -1.176979 | 0.863602  |
| 7             | 8             | 0           | 5.312667                | -1.608949 | 2.455601  |
| 8             | 8             | 0           | 5.299592                | 2.519851  | 0.301467  |
| 9             | 8             | 0           | 1.944492                | -0.682326 | -0.765089 |

|    |   |   |           |           |           |
|----|---|---|-----------|-----------|-----------|
| 10 | 6 | 0 | 2.876917  | 2.046132  | -1.047332 |
| 11 | 6 | 0 | 1.425098  | 2.155273  | -1.236788 |
| 12 | 6 | 0 | 0.542720  | 1.845685  | -0.283791 |
| 13 | 6 | 0 | -1.629867 | 1.913968  | 0.861884  |
| 14 | 6 | 0 | -0.901511 | 2.047115  | -0.320201 |
| 15 | 6 | 0 | -1.604050 | 2.354008  | -1.490240 |
| 16 | 6 | 0 | -2.975695 | 2.499752  | -1.482507 |
| 17 | 6 | 0 | -3.684058 | 2.347847  | -0.292414 |
| 18 | 6 | 0 | -3.000870 | 2.081950  | 0.887405  |
| 19 | 8 | 0 | -5.032224 | 2.452139  | -0.341689 |
| 20 | 8 | 0 | 3.584016  | 2.919777  | -1.569549 |
| 21 | 1 | 0 | 6.174504  | 0.750946  | 1.919820  |
| 22 | 1 | 0 | 3.179468  | -2.177060 | 0.972121  |
| 23 | 1 | 0 | 4.850688  | -2.450693 | 2.494211  |
| 24 | 1 | 0 | 4.861953  | 2.939935  | -0.471457 |
| 25 | 1 | 0 | 1.778229  | -1.638730 | -0.650477 |
| 26 | 1 | 0 | 1.129376  | 2.664379  | -2.146838 |
| 27 | 1 | 0 | 0.919762  | 1.412260  | 0.637853  |
| 28 | 1 | 0 | -1.110683 | 1.673535  | 1.782103  |
| 29 | 1 | 0 | -1.075418 | 2.454199  | -2.429734 |
| 30 | 1 | 0 | -3.517192 | 2.705930  | -2.396541 |
| 31 | 1 | 0 | -3.545480 | 1.979280  | 1.817350  |
| 32 | 1 | 0 | -5.422508 | 2.094686  | 0.464612  |
| 33 | 6 | 0 | -3.391318 | -1.485396 | -0.569372 |
| 34 | 6 | 0 | -4.562678 | -0.885863 | -0.161988 |
| 35 | 6 | 0 | -4.762474 | -0.609133 | 1.186697  |
| 36 | 6 | 0 | -3.803416 | -0.965866 | 2.125550  |
| 37 | 6 | 0 | -2.625223 | -1.550780 | 1.701455  |
| 38 | 6 | 0 | -2.395647 | -1.822963 | 0.352642  |
| 39 | 6 | 0 | -1.134244 | -2.432040 | -0.045931 |
| 40 | 6 | 0 | -0.889564 | -3.080211 | -1.189419 |
| 41 | 8 | 0 | -5.888841 | 0.071989  | 1.517504  |
| 42 | 6 | 0 | 0.433714  | -3.641886 | -1.453944 |
| 43 | 8 | 0 | 1.458019  | -3.370088 | -0.849348 |
| 44 | 8 | 0 | 0.429622  | -4.516148 | -2.456835 |
| 45 | 1 | 0 | -3.235711 | -1.664329 | -1.625516 |
| 46 | 1 | 0 | -5.315405 | -0.588404 | -0.879667 |
| 47 | 1 | 0 | -3.958194 | -0.746461 | 3.175183  |
| 48 | 1 | 0 | -1.864631 | -1.797790 | 2.432216  |
| 49 | 1 | 0 | -0.326284 | -2.365337 | 0.677542  |
| 50 | 1 | 0 | -1.652618 | -3.258699 | -1.934841 |
| 51 | 1 | 0 | -5.955356 | 0.167920  | 2.471816  |
| 52 | 1 | 0 | 1.332232  | -4.835663 | -2.588279 |

#### H<sup>4</sup> ... O<sup>α</sup> + O<sup>β</sup> ... H<sup>a</sup>

| Center<br>Number | Atomic<br>Number | Atomic<br>Type | Coordinates (Angstroms) |           |           |
|------------------|------------------|----------------|-------------------------|-----------|-----------|
|                  |                  |                | X                       | Y         | Z         |
| 1                | 6                | 0              | 7.135916                | 2.625483  | 1.024250  |
| 2                | 6                | 0              | 7.270317                | 2.659043  | -0.353403 |
| 3                | 6                | 0              | 6.843745                | 1.573042  | -1.100046 |
| 4                | 6                | 0              | 6.202475                | 0.458983  | -0.497544 |
| 5                | 6                | 0              | 6.148702                | 0.441733  | 0.911583  |
| 6                | 6                | 0              | 6.598950                | 1.512537  | 1.665154  |
| 7                | 8                | 0              | 7.575027                | 3.696325  | 1.713039  |
| 8                | 8                | 0              | 7.040691                | 1.626144  | -2.421721 |
| 9                | 8                | 0              | 5.694693                | -0.670153 | 1.523228  |
| 10               | 6                | 0              | 5.660299                | -0.591110 | -1.377223 |
| 11               | 6                | 0              | 4.453193                | -1.359980 | -1.056123 |
| 12               | 6                | 0              | 3.447289                | -0.882812 | -0.317848 |
| 13               | 6                | 0              | 1.245068                | -0.870830 | 0.769935  |
| 14               | 6                | 0              | 2.158906                | -1.517009 | -0.063738 |
| 15               | 6                | 0              | 1.788689                | -2.753427 | -0.605079 |
| 16               | 6                | 0              | 0.563863                | -3.318405 | -0.322237 |
| 17               | 6                | 0              | -0.331242               | -2.658070 | 0.518054  |
| 18               | 6                | 0              | 0.013335                | -1.426766 | 1.065138  |
| 19               | 8                | 0              | -1.519438               | -3.252386 | 0.767771  |
| 20               | 8                | 0              | 6.179089                | -0.789973 | -2.484364 |
| 21               | 1                | 0              | 7.730324                | 3.505268  | -0.843424 |
| 22               | 1                | 0              | 6.554147                | 1.470550  | 2.747143  |
| 23               | 1                | 0              | 7.446766                | 3.566098  | 2.656520  |
| 24               | 1                | 0              | 6.833030                | 0.732456  | -2.773683 |

|    |   |   |            |           |           |
|----|---|---|------------|-----------|-----------|
| 25 | 1 | 0 | 5.721298   | -0.554225 | 2.476670  |
| 26 | 1 | 0 | 4.373362   | -2.295910 | -1.596552 |
| 27 | 1 | 0 | 3.574801   | 0.087693  | 0.151391  |
| 28 | 1 | 0 | 1.506298   | 0.088990  | 1.199936  |
| 29 | 1 | 0 | 2.465553   | -3.286004 | -1.260656 |
| 30 | 1 | 0 | 0.282703   | -4.274484 | -0.744261 |
| 31 | 1 | 0 | -0.681144  | -0.909921 | 1.715803  |
| 32 | 1 | 0 | -2.071313  | -2.694532 | 1.357320  |
| 33 | 6 | 0 | -7.722368  | 1.284768  | 0.853641  |
| 34 | 6 | 0 | -8.836497  | 2.089673  | 0.772319  |
| 35 | 6 | 0 | -9.529534  | 2.199070  | -0.433300 |
| 36 | 6 | 0 | -9.092285  | 1.496625  | -1.550940 |
| 37 | 6 | 0 | -7.971923  | 0.692135  | -1.454272 |
| 38 | 6 | 0 | -7.264430  | 0.566323  | -0.257613 |
| 39 | 6 | 0 | -6.094525  | -0.299214 | -0.221243 |
| 40 | 6 | 0 | -5.305544  | -0.544381 | 0.831623  |
| 41 | 8 | 0 | -10.614831 | 3.000654  | -0.453966 |
| 42 | 6 | 0 | -4.148855  | -1.431456 | 0.775655  |
| 43 | 8 | 0 | -3.439226  | -1.646131 | 1.747940  |
| 44 | 8 | 0 | -3.917478  | -1.994713 | -0.408788 |
| 45 | 1 | 0 | -7.201859  | 1.216492  | 1.800056  |
| 46 | 1 | 0 | -9.186981  | 2.642741  | 1.633733  |
| 47 | 1 | 0 | -9.626630  | 1.579532  | -2.489930 |
| 48 | 1 | 0 | -7.637567  | 0.147380  | -2.329088 |
| 49 | 1 | 0 | -5.852741  | -0.790580 | -1.158273 |
| 50 | 1 | 0 | -5.471298  | -0.100406 | 1.803721  |
| 51 | 1 | 0 | -11.016091 | 2.998334  | -1.327152 |
| 52 | 1 | 0 | -3.132154  | -2.563333 | -0.344835 |

### H<sup>3</sup> ... O<sub>γ</sub> + H<sup>4</sup> ... O<sub>α</sub>

| Center<br>Number | Atomic<br>Number | Atomic<br>Type | Coordinates (Angstroms) |           |           |
|------------------|------------------|----------------|-------------------------|-----------|-----------|
|                  |                  |                | X                       | Y         | Z         |
| 1                | 6                | 0              | 4.826555                | 1.558682  | -1.156693 |
| 2                | 6                | 0              | 5.401580                | 0.347924  | -1.508457 |
| 3                | 6                | 0              | 4.951203                | -0.812192 | -0.900652 |
| 4                | 6                | 0              | 3.868420                | -0.797994 | 0.013549  |
| 5                | 6                | 0              | 3.367134                | 0.461965  | 0.400371  |
| 6                | 6                | 0              | 3.828321                | 1.628731  | -0.189488 |
| 7                | 8                | 0              | 5.300674                | 2.664019  | -1.764964 |
| 8                | 8                | 0              | 5.561884                | -1.956977 | -1.230288 |
| 9                | 8                | 0              | 2.473477                | 0.508986  | 1.399337  |
| 10               | 6                | 0              | 3.340400                | -2.084507 | 0.492521  |
| 11               | 6                | 0              | 1.908558                | -2.303269 | 0.738503  |
| 12               | 6                | 0              | 0.947860                | -1.699656 | 0.033204  |
| 13               | 6                | 0              | -1.306727               | -1.543661 | -0.948480 |
| 14               | 6                | 0              | -0.483084               | -1.983408 | 0.088397  |
| 15               | 6                | 0              | -1.079343               | -2.676250 | 1.146141  |
| 16               | 6                | 0              | -2.438344               | -2.912233 | 1.170048  |
| 17               | 6                | 0              | -3.247042               | -2.467747 | 0.123689  |
| 18               | 6                | 0              | -2.667032               | -1.793418 | -0.948293 |
| 19               | 8                | 0              | -4.571565               | -2.700524 | 0.210271  |
| 20               | 8                | 0              | 4.093099                | -3.061735 | 0.594897  |
| 21               | 1                | 0              | 6.209866                | 0.307375  | -2.224634 |
| 22               | 1                | 0              | 3.433059                | 2.587232  | 0.123944  |
| 23               | 1                | 0              | 4.845839                | 3.445972  | -1.440835 |
| 24               | 1                | 0              | 5.235726                | -2.641968 | -0.608657 |
| 25               | 1                | 0              | 2.188646                | 1.421406  | 1.572823  |
| 26               | 1                | 0              | 1.690549                | -3.127967 | 1.407248  |
| 27               | 1                | 0              | 1.240493                | -0.940542 | -0.686698 |
| 28               | 1                | 0              | -0.871528               | -0.996875 | -1.776701 |
| 29               | 1                | 0              | -0.476841               | -3.014620 | 1.979742  |
| 30               | 1                | 0              | -2.896651               | -3.426494 | 2.004826  |
| 31               | 1                | 0              | -3.285557               | -1.451122 | -1.768229 |
| 32               | 1                | 0              | -5.079329               | -2.114215 | -0.384785 |
| 33               | 6                | 0              | -1.926794               | 1.186571  | 1.104494  |
| 34               | 6                | 0              | -0.700742               | 1.470968  | 1.663314  |
| 35               | 6                | 0              | -0.100178               | 2.700063  | 1.413234  |
| 36               | 6                | 0              | -0.730838               | 3.643734  | 0.615636  |
| 37               | 6                | 0              | -1.961456               | 3.343475  | 0.059294  |
| 38               | 6                | 0              | -2.583032               | 2.115916  | 0.289769  |
| 39               | 6                | 0              | -3.848862               | 1.822647  | -0.372672 |

|    |   |   |           |           |           |
|----|---|---|-----------|-----------|-----------|
| 40 | 6 | 0 | -4.587941 | 0.726424  | -0.182873 |
| 41 | 8 | 0 | 1.127734  | 2.913076  | 1.963389  |
| 42 | 6 | 0 | -5.721217 | 0.352231  | -1.024154 |
| 43 | 8 | 0 | -6.115731 | -0.797844 | -1.124020 |
| 44 | 8 | 0 | -6.281976 | 1.345585  | -1.706668 |
| 45 | 1 | 0 | -2.359287 | 0.211735  | 1.287872  |
| 46 | 1 | 0 | -0.190546 | 0.740321  | 2.276537  |
| 47 | 1 | 0 | -0.258335 | 4.598277  | 0.418354  |
| 48 | 1 | 0 | -2.445990 | 4.075427  | -0.575479 |
| 49 | 1 | 0 | -4.174011 | 2.545049  | -1.114420 |
| 50 | 1 | 0 | -4.310964 | -0.027059 | 0.539710  |
| 51 | 1 | 0 | 1.435764  | 3.805233  | 1.779288  |
| 52 | 1 | 0 | -6.976068 | 0.976167  | -2.267969 |

---

## References

- 1 S. A. Kovalenko, A. L. Dobryakov, J. Ruthmann and N. P. Ernsting, *Phys. Rev. A*, 1999, **59**, 2369–2384.
